1 **Title: *Tbx1*, a 22q11.2-encoded gene, is a link between alterations in**  
2 **fimbria myelination and cognitive speed in mice**

3  
4 **Short title:** *Tbx1*, fimbria myelination, and cognitive speed

5  
6 **Authors**

7 Takeshi Hiramoto<sup>1†</sup>; Akira Sumiyoshi<sup>2,3†</sup>; Takahira Yamauchi<sup>1†</sup>; Kenji Tanigaki<sup>5</sup>; Qian  
8 Shi<sup>6</sup>, Gina Kang<sup>1</sup>; Rie Ryoke<sup>2</sup>; Hiroi Nonaka<sup>2</sup>; Shingo Enomoto<sup>7</sup>; Takeshi Izumi<sup>8</sup>;  
9 Manzoor A. Bhat<sup>6</sup>; Ryuta Kawashima<sup>2</sup>; Noboru Hiroi<sup>1,6,10\*</sup>

10  
11 \*Corresponding author Noboru Hiroi, PhD

12 hiroi@uthscsa.edu

13 Department of Pharmacology; Department of Cellular and Integrative Physiology;

14 Department of Cell Systems and Anatomy

15 University of Texas Health Science Center, San Antonio

16 Room 211B

17 7703 Floyd Curl Drive

18 San Antonio, TX 78229

19 1 210 567 4169 (tel)

20  
21 † These authors contributed equally to the work.

22  
23 **Affiliations**

24 <sup>1</sup>Department of Pharmacology, <sup>6</sup>Department of Cellular and Integrative Physiology,

25 <sup>10</sup>Department of Cell Systems and Anatomy, University of Texas Health Science Center

26 at San Antonio, Texas, 78229 USA.

27 <sup>2</sup>Institute of Development, Aging, and Cancer, Tohoku University, 4-1, Seiryō-cho, Aoba-  
28 ku, Sendai 980-8575, Japan.

29 <sup>3</sup>National Institutes for Quantum and Radiological Science and Technology, 4-9-1,  
30 Anagawa, Inage-ku, Chiba 263-8555, Japan.

31 <sup>5</sup>Research Institute, Shiga Medical Center, 5-4-30 Moriyama, Moriyama-shi, Shiga,  
32 Japan.

33 <sup>7</sup>Department of Psychiatry and Behavioral Sciences, Albert Einstein College of Medicine,  
34 1300 Morris Park Avenue, Bronx, NY, 10461 USA.

35 <sup>8</sup>Department of Pharmacology and <sup>9</sup>Advanced Research Promotion Center, Health  
36 Sciences University of Hokkaido, 1757 Kanazawa, Tobesu, Ishikari, Hokkaido 061-0293.

45 **Abstract**

46 Copy number variants (CNVs) have provided a reliable entry point to identify structural  
47 correlates of atypical cognitive development. Hemizygous deletion of human  
48 chromosome 22q11.2 is associated with impaired cognitive function; however, the  
49 mechanisms by which numerous genes encoded in this CNV contribute to cognitive  
50 deficits via diverse structural alterations in the brain remain unclear. This study aimed to  
51 determine the cellular basis of the link between alterations in brain structure and  
52 cognitive functions in a mouse model. The heterozygosity of *Tbx1*, a 22q11.2 gene,  
53 altered the composition of myelinated axons in the fimbria, reduced oligodendrocyte  
54 production capacity, and slowed the acquisition of spatial memory and cognitive  
55 flexibility. Our findings provide a cellular basis for specific cognitive dysfunctions that  
56 occur in patients with loss-of-function *TBX1* variants and 22q11.2 hemizygous deletion.

57  
58

59 **Teaser**

60 A risk gene for autism alters myelin composition in the hippocampal connection and

61 slows cognitive speed.

## 62 INTRODUCTION

63 Although copy number variants (CNVs) are rare and occur in <1% of patients with any  
64 psychiatric disorder, they are robustly and consistently associated with developmental  
65 neuropsychiatric disorders (1, 2). Moreover, CNVs affect specific cognitive functions  
66 independent of clinically defined mental illness (3). Currently available pharmaceutical  
67 medications do not significantly improve cognitive deficits associated with many mental  
68 disorders due to a lack of understanding of their causative mechanistic targets.

69  
70 Despite their robust association with cognitive impairments and psychiatric disorders,  
71 CNVs pose a challenge when attempting to understand the composition of contributory  
72 genes, as accurate identification of CNV-encoded genes contributing to human  
73 phenotypes remains difficult. A recent large-scale genome-wide exome screening study  
74 reported that protein-truncating variants of genes encoded in several large-sized CNVs  
75 are linked with autism spectrum disorder (ASD) (4). However, failure to detect similar  
76 variants of other CNV-encoded genes may be attributable to their rarity, as larger sample  
77 sizes enable the identification of more gene variants than smaller-scale analyses(4,  
78 5). Moreover, variants in promoters and enhancers may contribute to phenotypes  
79 (6). Variants of CNV-encoded single genes may simply not exist, and single-gene  
80 hemizyosity or duplication, as part of a CNV, may play the role of a driver gene. Thus,  
81 there is a need to utilize complementary approaches to identify driver genes encoded by  
82 large CNVs.

83  
84 There are more human and mouse studies of human chromosome 22q11.2 deletion than  
85 other CNVs, given that it was found to be associated with mental illness much earlier  
86 than other CNVs (7). Hemizygous deletion of 22q11.2 CNVs is robustly associated with

87 diverse disorders, including ASD, attention-deficit/hyperactivity disorder, schizophrenia,  
88 and intellectual disability (ID) (8). Moreover, individuals with 22q11.2 hemizyosity  
89 exhibit deterioration in specific cognitive functions, including the accuracy and speed of  
90 memory acquisition, executive functions, and social cognition (9-11). Further, cognitive  
91 impairment precedes and predicts the onset of schizophrenia among 22q11.2  
92 hemizyosity carriers (12, 13). In addition, recent large-scale imaging studies have  
93 demonstrated altered white matter integrity in the brains of 22q11.2 hemizygous deletion  
94 carriers (14-16); no DTI-MRI analysis of mouse models of 22q11.2 hemizyosity have  
95 been reported. However, since many regions show altered white matter integrity and this  
96 CNV contains a minimum of 30 protein-coding genes, the exact causative associations  
97 among encoded genes, structural alterations, and atypical cognitive development remain  
98 unclear.

99  
100 Rare loss-of-function variants (e.g., frameshift deletion) of *TBX1*, a gene encoded by a  
101 22q11.2 CNV, have been associated with ASD, ID, and seizures (17-20). However,  
102 these *TBX1* variant carriers also exhibit single nucleotide variants (SNVs) in other genes  
103 (19), and only a few cases/families with those variants have been identified. The  
104 causative structural substrates in the brain mediating the impacts of *Tbx1* deficiency on  
105 cognitive impairment remain unknown.

106  
107 Mouse studies have provided a complementary means to address limitations of these  
108 human studies by systematically examining the roles of small chromosomal segments  
109 and individual genes in behaviors against a homogeneous genetic background (8, 20-  
110 30). These studies have demonstrated that some, but not all, 22q11.2-encoded single  
111 genes contribute to select behavioral targets (8, 26, 29). For example, our results have

112 revealed that *Tbx1* heterozygosity impairs social interaction and communication (24, 27,  
113 28, 30). The present study aimed to determine the structural and cellular basis  
114 underlying the effects of *Tbx1* heterozygosity on specific cognitive functions in a  
115 congenic mouse model.

## 116 RESULTS

117 There are alterations in white matter microstructures in many brain regions of 22q11.2  
118 hemizyosity carriers (14-16). However, little is known regarding the exact nature of  
119 altered white matter microstructures and driver genes that affect both the white matter  
120 and cognitive functions.

### 122 Analysis of white matter structures

#### 123 Tbx1 deficiency decreases fractional anisotropy (FA) signals in the fimbria

124 *Tbx1* +/- mice and their +/+ littermates underwent *ex vivo* diffusion tensor imaging (DTI)-  
125 magnetic resonance imaging (MRI). We analyzed 19 brain regions (**Fig. S1**), as defined  
126 by the standard regional classification of the mouse brain (31). The FA value is the most  
127 histologically validated DTI-MRI metric (32). However, since FA signals of <0.3 are not  
128 reliably correlated with the degree of myelination (33) and cannot be accurately aligned  
129 across individual animals (34), we selected regions with FA values  $\geq 0.3$ . The corpus  
130 callosum, anterior commissure, internal capsule, and fimbria met this criterion (**Fig.**  
131 **S2A**). The fimbria was the only region exhibiting a significant change: FA values were  
132 lower in +/- mice than in +/+ mice (**Fig. 1**). Consistently, the fimbria exhibited the largest  
133 effect size for genotype-dependent differences in FA values (**Fig. S2B**). There were no  
134 significant differences in axial diffusivity (AD), radial diffusivity (RD), or mean diffusivity  
135 (MD) values between +/+ and +/- mice (**Fig. S3-5**).

#### 139 Tbx1 deficiency reduces myelination in the fimbria

140 DTI-MRI analysis of the mouse brain has limited spatial resolution, as well as technical  
141 and interpretative limitations (32, 35). The structural classifications of Ma et al. (31)  
142 include the fimbria, fornix, stria terminalis, and hippocampal commissure in the “fimbria”.  
143 To circumvent these limitations and histologically validate the DTI-MRI findings, we used  
144 the non-hydroscopic gold-phosphate complex Black-Gold II (36). This method provides  
145 more consistent staining than hydroscopic gold chloride staining and higher contrast and  
146 resolution than lipid soluble dyes (e.g., Luxol Fast Blue). Black-Gold II also directly stains  
147 myelin, unlike markers of myelin components (e.g., myelin basic protein [MBP]), which  
148 may not perfectly correlate with the degree of myelination. We examined regions with the  
149 largest and second largest effect sizes among FA values  $\geq 0.3$ : the fimbria and corpus  
150 callosum (**Fig. S2B; S6**). The intensity of gold staining was lower in the anterior fimbria  
151 of +/- mice than in that of +/+ mice (**Fig. 2A**). There was no statistically detectable  
152 between-genotype difference in the posterior fimbria or anterior/posterior corpus  
153 callosum (**Fig. 2B-D**).

154

### 155 *Tbx1* deficiency reduces large myelinated axons in the fimbria

156 We used electron microscopy (EM) to characterize the myelination of axons in the  
157 fimbria and corpus callosum at the ultrastructural level. Myelination appeared thicker and  
158 thinner in the fimbria and corpus callosum, respectively, of +/- mice than in that of +/+  
159 mice (**Fig. 3AB**). We compared g-ratios (i.e., the ratio of axon diameter to the axon +  
160 myelin diameter) to quantitatively evaluate relative myelin thickness (**Fig. 3C, D**). The g-  
161 ratios of +/+ mice plateaued slightly above 0.8, which is an expected value for the  
162 optimal efficiency of axon myelination in the central nervous system (CNS) (37). The g-  
163 ratios of +/- mice were smaller (i.e., relatively thicker myelin sheath) in the fimbria (**Fig.**  
164 **3C**), but not in the corpus callosum (**Fig. 3D**). Volume is a limiting factor in the CNS: The



165 myelination efficiency steeply decreases when myelin thickness deviates from the  
166 optimal g-ratio (~0.8) (37) regardless of whether it is hyper- or hypo-myelination.  
167 Therefore, this gene deficiency results in a functionally sub-optimal population of axons  
168 in the fimbria.

169  
170 A further in-depth analysis revealed that 1) myelin was thicker in axons with diameters  
171  $\geq 700$  nm to  $< 1,700$  nm in the fimbria of +/- mice than of +/+ mice (**Fig. 3E; Fig. S7A**); 2)  
172 there were proportionally fewer myelinated axons  $\geq 1,200$  nm in diameter in the fimbria of  
173 +/- mice than of +/+ mice (**Fig. S8A; S-Table 1**); and 3) there were no myelinated axons  
174  $\geq 1,700$  nm in diameter in the fimbria of +/- mice (**Fig. 3E; S8A**). In the corpus callosum,  
175 myelin was thinner in axons with diameters between 1,000 nm and 1,400 nm in +/- mice  
176 than in +/+ mice (**Fig. 3F**). The relative proportion of axons in the corpus callosum was  
177 increased in axons between  $\geq 400$  nm and  $< 800$  nm in diameter and was decreased in  
178 axons  $\geq 800$  nm in diameter in +/- mice (**Fig. S8B; S-Table 1**). There were no myelinated  
179 corpus callosum axons with diameters  $\geq 2,000$  nm in +/- mice (**Fig. 3F; Fig. S8B**).

180  
181 In sum, *Tbx1* heterozygous mice lacked large ( $\geq 1,700$  nm) myelinated axons and  
182 exhibited hyper-myelination of axons up to 1,700 nm in diameter in the fimbria. In the  
183 corpus callosum of +/- mice, axons with diameters ranging from 1,000 to 1,400 nm were  
184 hypomyelinated. In addition, +/- mice exhibited proportionally more myelinated axons  
185 with diameters between 400 nm and 800 nm but less myelinated axons with diameters  
186  $\geq 800$  nm in the corpus callosum.

187

188

189 *Tbx1* heterozygosity impacts a molecule critical for early oligodendrogenesis

190 Oligodendrocytes and their precursor cells are present locally in the fimbria and, to a  
191 lesser extent, in the corpus callosum. The molecular steps through which *Tbx1* impacts  
192 oligodendrogenesis and myelination remains unknown. Given that *Tbx1* mRNA is  
193 reduced in the fimbria and corpus callosum of *Tbx1* +/- mice compared to +/+ mice (**Fig.**  
194 **4**), we examined the impact of a dose reduction of *Tbx1* mRNA on molecules functionally  
195 critical for each step of oligodendrogenesis and myelination in 2- to 3-month-old *Tbx1* +/-  
196 and +/+ littermates, using qRT-PCR. The myelinating process of the fimbria starts in the  
197 second neonatal week and reaches its peak around postnatal day 24-37 in rodents (38).

198  
199 Ng2 (*Cspg4*) and *Pdgfr2*, markers of oligodendrocyte precursor cells, are functionally  
200 required for the production of oligodendrocyte precursor cells (39, 40). We found that  
201 mRNA levels of *Ng2* and, but not of *Pdgfr2*, were selectively lower in the fimbria of +/-  
202 mice than in that of +/+ mice (**Fig. 4A**). There was no detectable difference in *Ng2* or  
203 *Pdgfr2* mRNA levels in the corpus callosum between +/+ and +/- mice (**Fig. 4B**). MBP is  
204 essential for the maintenance of myelin and is involved in the adhesion and compaction  
205 of the cytosolic membrane leaflets that form the structural basis of multilayered myelin  
206 (41, 42). Myelin oligodendrocyte glycoprotein (MOG) is a marker of mature  
207 oligodendrocytes and myelin, although it is not functionally critical for myelin formation or  
208 maintenance (43). No differences in MBP or MOG levels were observed in the fimbria or  
209 corpus callosum between +/+ and +/- mice (**Fig. 4AB**). This *in vivo* analysis indicated  
210 that *Tbx1* heterozygosity selectively impacts the very early molecular step of  
211 oligodendrogenesis locally in the fimbria but has no effect on molecules required for  
212 myelin formation and maintenance in this location.

213

214 *Tbx1* heterozygosity reduces oligodendrocyte generation

215 Another source of oligodendrocytes in the fimbria is the population of adult neural  
216 progenitor cells in the subventricular zone (44-47), which is distinct from those  
217 generating neurons (48). Given the enrichment of Tbx1 protein in the adult subventricular  
218 zone (SVZ) (24), we aimed to determine whether *Tbx1* heterozygosity affects the cell-  
219 autonomous capacity of this oligodendrocyte population. Progenitor cells were taken  
220 from the lateral ventricular wall, including the subventricular zone, of 3-week-old *Tbx1* +/-  
221 and +/+ littermates and cultured and differentiated into oligodendrocytes *in vitro*.  
222 Progenitor cells derived from the subventricular zone of *Tbx1* +/- mice produced fewer  
223 O4-positive immature and mature oligodendrocytes than those derived from +/+ mice  
224 (**Fig. 5AB**). This *in vitro* assay demonstrated that *Tbx1* heterozygosity reduced  
225 oligodendrocyte production from progenitor cells of the SVZ in a cell-autonomous  
226 manner.

227  
228 DTI-MRI analysis detected the region exhibiting the most robust alteration in white matter  
229 integrity. This observation was validated using Black-Gold II staining, which provided a  
230 higher anatomical resolution of the net myelination levels. Although decreased FA values  
231 and reduced net myelin signals are suggestive of less myelin, axonal degeneration,  
232 reduced axonal density, or changes in axonal organization (49), our EM analyses  
233 complemented these assessments of the net signal intensities by demonstrating a loss  
234 of large myelinated axons in the fimbria and reduced myelination in axons with specific  
235 diameters in the corpus callosum. Our qRT-PCR and *in vitro* analyses further indicated  
236 that *Tbx1* heterozygosity reduced levels of the molecule needed for the generation of  
237 local oligodendrocyte precursor cells and the production capacity of oligodendrocytes in  
238 the lateral ventricular wall.

239 **Analysis of cognitive functions**

240 Individuals with 22q11.2 hemizygous deletions exhibit lower scores on measures of attention,  
241 executive function, processing speed, visual memory, visuospatial skills, and social cognition  
242 (9, 11). However, the link between structural alterations caused by single 22q11.2 genes and  
243 changes in cognitive function remains unknown. In addition, although human studies have  
244 reported an association between loss-of-function *TBX1* variants and developmental  
245 neuropsychiatric disorders (17-20), their effects on cognitive function remain uncharacterized.  
246 Since we observed that *Tbx1* heterozygosity leads to myelin alterations in the fimbria, we  
247 examined its effects on cognitive capacities known to rely on the fimbria.

248

#### 249 *Tbx1* heterozygosity slows the acquisition of spatial reference memory

250 The spatial reference memory version of the Morris water maze requires an intact fimbria,  
251 whereas the visual cued version depends on the dorsal striatum in rodents (50, 51). Humans  
252 with 22q11.2 hemizygosity exhibit impaired spatial processing and memory (9, 52-54).  
253 Although a previous study reported that spatial reference memory retention and recall in the  
254 Morris water maze were normal in a mouse model of 22q11.2 hemizygosity (55), no studies  
255 have investigated these capacities in the acquisition phase.

256

257 *Tbx1* +/- mice exhibited delayed spatial memory acquisition in the Morris water maze (**Fig.**  
258 **6A-C**). In contrast, there was no between-genotype difference in the re-probe test (**Fig. 6D**)  
259 or during visual cue memory acquisition (**Fig. 6E**). These data indicate that *Tbx1*  
260 heterozygosity impairs the acquisition speed of fimbria-dependent spatial reference memory,  
261 but not its retention or recall, or fimbria-independent visual cued memory.

262

263

#### 264 *Tbx1* heterozygosity slows the acquisition of discrimination and cognitive flexibility

265 Individuals with 22q11.2 hemizygous deletion also exhibit impairments in executive functions  
266 (9). Congenic mouse models of 22q11.2 hemizygosity require an increased number of trials  
267 to reach the criteria for simple discrimination and reversal learning (56) or extradimensional  
268 shifting (EDS) (57). However, the individual 22q11.2 genes contributing to impairments in  
269 executive functions remain unclear. In humans, prefrontal cortical lesions increase the  
270 number of trials required to reach the criterion of attentional set shifting; on the other hand,  
271 hippocampal lesions affect the latency for completing each trial (58). In rodents, orbitofrontal  
272 cortical lesions increase the number of trials required to achieve reversal of the intra-  
273 dimensional set (IDS-IV rev) (59, 60), although there have been no mouse studies regarding  
274 the latency for achieving attentional set shifting. *Tbx1* +/- mice lacked detectable white matter  
275 alterations in the basal forebrain or cortex (see **Fig. S2-5**) but exhibited altered myelination in  
276 the fimbria. Thus, we reasoned that *Tbx1* +/- mice may exhibit altered latency in completing  
277 attentional set shifting but may be unaffected in terms of the attentional set-shifting task  
278 requiring the prefrontal cortex (number of trials needed to reach a criterion).

279  
280 There was no between-genotype difference in the number of trials required to complete  
281 each phase of attentional set shifting (**Fig. 7A**). In contrast, +/- mice were slower in  
282 completing each trial of attentional set shifting, most significantly in simple discrimination  
283 (SD) and IDS-IV rev (**Fig. 7B**).

284  
285 *Tbx1* heterozygosity has no detectable effects on olfactory responses

286 Consistent with the lack of detectable alterations in the white matter integrity of the  
287 neocortex, amygdala, and olfactory bulb (**Fig. S2-S5**), there was no between-genotype  
288 difference in responses or habituation to non-social and social olfactory cues (**Fig. S9**).  
289 This observation suggests that *Tbx1* heterozygosity does not exert non-specific effects

290 on visual, olfactory, or tactile perception or on the general motivation to approach an  
291 object or odorants.

292

293 In sum, our behavioral analysis identified a highly demarcated deficit in the acquisition of  
294 fimbria-dependent cognitive tasks in Tbx1 +/- mice.

## 295 **DISCUSSION**

296 The cellular, structural, or cognitive consequences of loss-of-function *TBX1* variants in  
297 humans remain unclear. A parallel analysis of structural and behavioral measures in a  
298 congenic mouse model of *Tbx1* heterozygosity indicated that *Tbx1* deficiency caused  
299 highly demarcated changes in the structural features of the brain, including reduced  
300 production of oligodendrocytes, suboptimal composition of myelination in the fimbria and  
301 corpus callosum, and loss of large myelinated axons in the fimbria and corpus callosum.  
302 These structural alterations impacted fimbria-dependent cognitive functions: *Tbx1*  
303 heterozygous mice exhibited increased latency to acquire spatial memory, simple  
304 discrimination, and reversal of intra-dimensional shift. Our findings are predictive of  
305 behavioral and structural alterations in carriers of loss-of-function *TBX1* variants in  
306 humans. Moreover, as individuals with 22q11.2 hemizyosity exhibit impairments in  
307 cognitive speed (9, 11, 61) as well as altered white matter integrity in the hippocampal  
308 projection fibers (14-16, 62), our data offer insight into the genetic and cellular substrates  
309 of these structural and behavioral alterations in carriers of 22q11.2 hemizyosity.

310  
311 From a technical perspective, our combined analytical approach overcame the  
312 weaknesses associated with each technique. DTI-MRI can simultaneously screen many  
313 regions and determine the brain regions with the largest effect sizes. However, it does  
314 not identify the exact nature of altered white matter signals. Black-Gold II staining allows  
315 better resolution and detection of the reduction in net myelin density. However, gold  
316 staining was not effective in detecting the subtle effect of *Tbx1* heterozygosity on the  
317 myelination of medium axons in the corpus callosum. Although EM is labor-intensive and  
318 is not suitable for screening to identify relevant regions in the entire brain, this  
319 ultrastructural analysis revealed subtle and selective myelin alterations in large and

320 medium axons. Therefore, a lack of detectable signal alterations in DTI-MRI or gold  
321 staining should not be considered as definitive. Moreover, an *in vitro* culture assay of  
322 oligodendrocyte precursor cells provides not only a means for evaluating gene effects on  
323 oligodendrogenesis but also a screening method for evaluating the effect of manipulating  
324 other genes and therapeutic ligands.

325  
326 The observations that *Ng2* mRNA was reduced in the fimbria (see **Fig. 4A**) while  
327 markers of mature oligodendrocytes were not (see **Fig. 4A**) are seemingly difficult to  
328 reconcile. Given that the fimbria of +/- mice contained hyper-myelinated medium axons  
329 but was devoid of large myelinated axons, it is possible that the effects of these positive  
330 and negative alterations on the net amount of MBP and MOG mRNA cancel out in in the  
331 fimbria. Moreover, as myelin was selectively reduced in the anterior fimbria only (see  
332 **Fig. 2AB**), such a regionally limited effect may be difficult to detect in the whole fimbria  
333 tissue used for qRT-PCR.

334  
335 The absence of large myelinated axons in the fimbria of +/- mice may be attributable to a  
336 reduced number of oligodendrocytes. Our *in vivo* data indicated that *Tbx1* heterozygosity  
337 impacts *Ng2*, a molecule required for the production of oligodendrocyte precursor cells,  
338 in the fimbria. Our *in vitro* analysis further revealed that fewer oligodendrocytes are  
339 produced from postnatal progenitor cells in +/- mice. Given their higher need for  
340 metabolic support from myelin and oligodendrocytes (63-65), a reduced number of  
341 oligodendrocytes may lead to degeneration of large axons. Alternatively, but not  
342 mutually exclusive, *Tbx1* heterozygosity may lead to selective inactivation of large-  
343 diameter axons and consequently reduced myelination of those axons, as  
344 oligodendrocytes tend to myelinate electrically active axons (66). In either case, the



345 remaining oligodendrocytes may have instead myelinated medium axons in the fimbria,  
346 which would explain the hyper-myelination of medium axons observed in the present  
347 study.

348  
349 Oligodendrocytes in the subventricular zone postnatally migrate to the fimbria and  
350 corpus callosum (47). In mice, *Tbx1* protein is postnatally enriched in the subventricular  
351 zone (24). Reduced myelination of medium-diameter axons in the corpus callosum—as  
352 well as a lack of large myelinated axons in the fimbria—may have also occurred due to  
353 reduced postnatal migration of oligodendrocytes from the subventricular zone of *Tbx1* +/-  
354 mice (see **Fig. 3EF**). It remains unclear how local oligodendrocyte precursor cells in the  
355 fimbria and oligodendrocytes postnatally provided from the subventricular zone  
356 contribute to the myelination of axons of different sizes. There is a need for further  
357 studies to explore the molecular mechanisms underlying the role of *Tbx1* in myelin  
358 composition within the fimbria and corpus callosum.

359  
360 Robust structural alterations in the fimbria exerted effects on the acquisition speed of  
361 spatial memory in the Morris water maze and cognitive flexibility in the attentional set  
362 shifting task. The first day of the Morris water maze reflects chance-level performance  
363 since the mice have not acquired a spatial map for the location of the platform. From day  
364 2 onward, the speed of mastering the spatial map is reflected by the latency to reach the  
365 platform, with +/- mice exhibiting a significant delay. When mice encounter the first  
366 discrimination task or reversal of intra-dimensional shift task, they are likely to face  
367 difficulty. In the present study, ++ mice exhibited longer latencies to complete those  
368 phases than other phases (see **Fig 7B**, SD and IDS-IV rev). It is noteworthy that +/- mice

369 exhibited the most significant delays in completing those phases, suggesting that *Tbx1*  
370 deficiency impairs the ability to quickly master cognitively difficult tasks.

371

372 Our single-gene analysis provides a valid first step for deconstruction and reconstruction  
373 of the mechanistic composition of CNV-encoded genes in terms of their association with  
374 specific behavioral and structural dimensions. We previously reported that gene-dose  
375 alterations of *Tbx1* impair reciprocal social interaction (21, 24), social communication  
376 (27, 30), and working memory (24, 28). The present findings further demonstrate the  
377 effects of *Tbx1* heterozygosity on the myelin composition of the fimbria and its cognitive  
378 functions. However, we cannot exclude the possibility that deficiency of other 22q11.2  
379 driver genes also contributes to similar and other cognitive deficits (29). Moreover, it is  
380 possible that other cellular mechanisms exist for social interaction and communication  
381 deficits of *Tbx1* heterozygosity. Since 22q11.2 CNVs also include genes without an  
382 apparent role in any dimension (i.e., non-contributory genes) (20, 22, 29, 67, 68), there is  
383 a need to comprehensively investigate each encoded single gene to elucidate the  
384 mechanisms underlying the effects of this CNV on behavioral dimensions. It should be  
385 cautioned, however, that a genotype may not impact a dimension as a unit and instead  
386 impact variables within a dimension (69)

387

388 The structural alterations and cognitive deficits observed in the present study are not  
389 unique to *Tbx1* heterozygosity or 22q11.2 CNVs. Lower FA values have been reported in  
390 the fimbria/fornix of individuals with idiopathic ASD (70) and schizophrenia (71). Slow  
391 processing speed in individuals with idiopathic ASD is correlated with low FA values, but  
392 not with MD, RD, or AD values, in the whole brain (72). Individuals with idiopathic ASD  
393 also exhibit impairments in difficult cognitive tasks (73). A selective loss of extra-large

394 myelinated axons has been observed in the brains of humans with ASD (74). Moreover,  
395 patients with idiopathic schizophrenia exhibit impaired processing speed across  
396 numerous cognitive dimensions, including attention, memory, spatial processing,  
397 emotional identification, and sensorimotor capacity (75, 76). Previous studies have also  
398 reported that other oligodendrocyte-related genes are dysregulated in brain samples  
399 from individuals with ASD and genetic mouse models for ASD (77-81). Taken together,  
400 our findings open a new window for investigating the potential substrates of altered  
401 cognitive speed in carriers of *TBX1* SNVs, 22q11.2 and other CNVs, and in idiopathic  
402 cases of ASD and schizophrenia.

403

#### 404 Limitations

405 We screened for specific brain regions using DTI-MRI imaging. However, our resolution  
406 (150  $\mu$ m isotropic voxel) may not have been sufficient for detecting subtle alterations.

407 Although DTI-MRI analysis revealed significant differences in the FA values for the  
408 fimbria only, EM analysis revealed less myelination exclusively in medium-sized axons in  
409 the corpus callosum of +/- mice as well. If the gene deficiency affects a specific structural  
410 set or axons with a certain diameter, it would be difficult to detect such subtle effects  
411 using DTI-MRI. Therefore, the finding regarding the absence of detectable alterations  
412 based on the DTI-MRI analysis of other regions should be interpreted cautiously.

413

414 We interchangeably used male and female mice for various analyses, as individuals with  
415 22q11.2 hemizyosity do not exhibit a sex bias for schizophrenia or ASD diagnosis (82)  
416 or for various cognitive capacities, including set-shifting, memory, and processing speed  
417 (9, 11). The number of currently identified *TBX1* loss-of-function mutations is too small to

418 determine a sex bias, however. Thus, there is a need for further research to determine  
419 the precise impact of sex on various phenotypes.

420

421

422

423

## 424 **MATERIALS AND METHODS**

### 425 **Experimental Design**

426 This study was designed to determine the structural and cellular bases underlying  
427 specific cognitive functions affected by *Tbx1* heterozygosity in a congenic mouse model.  
428 Specifically, we screened the most robust microstructural alterations using DTI-MRI,  
429 histologically validated the findings through gold staining, identified ultra-structural bases  
430 using EM, and determined the *in vitro* oligodendrocyte production capacity. After  
431 demonstrating that *Tbx1* heterozygosity alters myelin composition in the fimbria, we  
432 evaluated fimbria-dependent and fimbria-independent cognitive functions using the  
433 Morris water maze, attentional set shifting, and olfactory responses and habituation.

434

### 435 **Mice**

436 The protocols for animal handling and use were approved by the Animal Care and Use  
437 Committee of the Albert Einstein College of Medicine, University of Texas Health  
438 Science Center at San Antonio and Tohoku University in accordance with National  
439 Institutes of Health (NIH) guidelines.

440

441 *Tbx1*<sup>+/-</sup> mice This mouse model was a congenic strain with a C57BL/6J background. The  
442 original non-congenic *Tbx1*<sup>+/-</sup> mouse was backcrossed onto C57BL/6J inbred mice for

443 >10 generations to control for biased genetic backgrounds (83). Given that there are no  
444 sex biases in the prevalence of schizophrenia or ASD (82), set-shifting, spatial working  
445 memory, spatial planning, processing speed, or other cognitive domains (9, 11) among  
446 carriers of 22q11.2 hemizyosity, we used either male or female mice for the various  
447 analyses.

448

449 We determined genotypes of mice using three primers: forward  
450 TTGGTGACGATCATCTCGGT and reverse ATGATCTCCGCCGTGTCTAG to detect the  
451 +/+ genotype, as well as an additional reverse AGGTCCCTCGAAGAGGTTCA to detect  
452 the +/- genotype.

453

454 **Sample preparation:** We performed *ex vivo* MR scanning to achieve a high resolution  
455 and high signal-to-noise ratio since it allows a long scan time and involves the use of a  
456 contrast agent. In accordance with standard procedures (84), 4-month old female mice  
457 were anesthetized using pentobarbital (60 mg/kg, i.p.) and transcardially perfused using  
458 30 mL of 0.01 M phosphate-buffered saline (PBS) that contained 2 mM of ProHance  
459 (Bracco-Eisai Co., Ltd, Tokyo, Japan) and 1  $\mu$ L/mL heparin (1,000 USP units/mL),  
460 followed by 30 mL of 4% paraformaldehyde (PFA; Wako, Tokyo, Japan) containing 2  
461 mM ProHance. The head was decapitated, following which the skin, lower jaw, ears, and  
462 cartilaginous nose tip were removed. The skull structure containing the brain tissue was  
463 post-fixed in fixative (4% PFA and 2 mM ProHance) overnight at 4°C. Subsequently, it  
464 was transferred to buffer (0.01 M PBS, 0.02% sodium azide, and 2 mM ProHance) at  
465 4°C overnight. Next, the brain tissues were placed in fresh buffer (0.01 M PBS, 0.02%  
466 sodium azide + 2 mM ProHance). Immediately before scanning, we immersed *ex*  
467 *vivo* mouse brains in Fomblin (Sigma-Aldrich, St Louis, MO), which is a perfluorocarbon

468 that reduces susceptibility artifacts at the interface and limits intra-scanning sample  
469 dehydration.

470

471 **MRI acquisition:** MRI data were acquired using a 7.0-T PharmaScan 70/16 system with  
472 a 23-mm diameter birdcage Tx/Rx coil specifically designed for the mouse brain (Bruker  
473 Biospin, Ettlingen, Germany) using standard operational software (Paravision 6.0.1). We  
474 acquired triplot images to ensure proper sample positioning with respect to the magnet  
475 isocenter. Shim gradients were adjusted using the MAPSHIM protocol with an ellipsoid  
476 reference volume covering the whole brain. We obtained diffusion-weighted images  
477 using a standard spin-echo 2D pulse sequence using the following parameters: repetition  
478 time = 4,158 ms, echo time = 42 ms, field of view =  $15 \times 12 \text{ mm}^2$ , matrix size =  $100 \times 80$ ,  
479 in-plane resolution =  $0.15 \times 0.15 \text{ mm}^2$ , number of slices = 50, slice thickness = 0.3 mm,  
480 diffusion gradient duration = 6 ms, diffusion gradient separation = 30 ms, b-value = 2,000  
481  $\text{s/mm}^2$ , number of diffusion directions = 30, number of b0 images = 1, effective spectral  
482 bandwidth = 30 kHz, fat suppression = on, and number of averages = 10. The diffusion-  
483 weighted images was acquired at  $22^{\circ}\text{C}$ - $26^{\circ}\text{C}$  for 22 h per mouse.

484

485 **Diffusion-weighted image analysis:** Acquired images were processed using the  
486 Advanced Normalization Tools (<http://stnava.github.io/ANTs/>) and FMRIB Software  
487 Library (FSL) software packages (<https://fsl.fmrib.ox.ac.uk/fsl/fslwiki>). The procedure for  
488 image processing was as follows: (i) Image reconstruction was performed using  
489 Paravision software and converted to the NIfTI format using “DSI Studio” software  
490 (<http://dsi-studio.labsolver.org/>); (ii) eddy-current induced distortions were corrected  
491 using the eddy\_correct tool of FSL; (iii) individual reference b0 images were manually  
492 skull-stripped using ITK-SNAP software (<http://www.itksnap.org>); (iv) other subject b0

493 images were registered to the reference image and skull-stripped; (v) scalar images  
494 were reconstructed using the DTIFIT tool of FSL; (vi) b0 and scalar images were  
495 manually rotated and translated to ensure that the coordinate origins occupied the  
496 anterior commissure midpoint to roughly match the standard reference space; (vii) b0  
497 and scalar images were resampled onto an 0.15-mm isotropic voxel; (viii) the Minimum  
498 Deformation Template (MDT) space was constructed using all subject b0 and scalar  
499 images, including FA, AD, MD, and RD images; (ix) b0 and scalar images were warped  
500 to the MDT space; (x) the mean b0 image was computed, manually skull-stripped, and  
501 registered to the atlas image; and (xi) the mean FA, AD, MD, and RD values in each  
502 structure were computed and statistically analyzed.

503

#### 504 **Black-Gold II staining**

505 Two-to three-month-old female mice were perfused with saline and 4%  
506 paraformaldehyde as per the standard protocol (28). We mounted a pair of free-floating  
507 40- $\mu$ m thick coronal sections from a +/+ mouse and a +/- littermate as the upper and  
508 lower rows, respectively, on the same slides (3-4 section pairs per slide) to control for  
509 cross-slide staining variations. Care was taken to mount a section pair with similar  
510 coordinates from +/+ and +/- mice on the upper and lower rows of a slide.

511

512 The degree of myelination was examined using Black-Gold II staining (85). Black-Gold II  
513 is an aurohalophosphate complex that directly stains myelin within the CNS. Black-Gold  
514 II and sodium thiosulfate solution (AG105, Millipore, Temecula, CA) were heated to  
515 60°C. Slide-mounted sections were rehydrated in filtered water, transferred to pre-  
516 warmed Black-Gold II solution, and incubated at 60°C for >12 min. Subsequently, the  
517 sections were rinsed in filtered water twice for 2 min each, transferred to sodium

518 thiosulfate solution, and incubated for 3 min at 60°C. Finally, the sections were rinsed  
519 three times in filtered water for 2 min each and cover-slipped.

520

521 We semi-quantified gold-staining within the fimbria and corpus callosum using a  
522 Keyence microscope and its controller (BZ-X810 and BZ-X800E). Under a light  
523 microscope, staining blocked light penetration through the sections and registered as  
524 less bright. This property was employed for semi-quantitative analysis.

525

526 The fimbria and corpus callosum regions were delineated as targets (see **Fig. S6**). We  
527 divided the fimbria and corpus callosum at Bregma  $-1.30$  mm, the anterior and posterior  
528 of which were defined as anterior and posterior areas of the two regions for analysis.

529

530 The Keyence software yields brightness (B) values as integration values within a range  
531 of threshold values from 0 to 255. The threshold value acts as a filter and determines the  
532 level of light that is allowed to penetrate through a section. We observed that sampling  
533 pixels gradually saturated areas where tissues exist up to a threshold unit value of 137,  
534 above which pixels started to appear non-specifically in areas devoid of tissue (e.g.,  
535 blood vessels and between-tissue gaps). Thus, signals are maximally detected without  
536 false positive signals at this threshold value. This threshold was consistently used in the  
537 analysis of staining signals. Since B represents the sum of all integration values within  
538 the delineated area, it is affected by the size of the area. Because the target area size  
539 varied from section to section, we computed B per area (A) unit of the target (t) region  
540 (i.e.,  $tB/A$ ) in the fimbria and corpus callosum (**S-Table 1, Step 1**).

541



542 Although we minimized slide-to-slide variations in staining intensity by dipping a set of  
543 slides in the same Black-Gold II solution, there was still variation. This was observed as  
544 varying non-specific baseline staining across sections. To correct for this variation, we  
545 adjusted the tB/A value based on the degree of non-specific staining. We chose a 250  
546  $\mu\text{m} \times 250 \mu\text{m}$  cortical area above the target fimbria and corpus callosum, where gold-  
547 labeling was negligible. We defined it as a negative control (nc) area where B/A values  
548 represent non-specific staining (**S-Table 1, Step 2**). The threshold unit for genuine tissue  
549 signals was 255 in the cortex, above which signals started to appear in areas with no  
550 tissue. We next chose a section with the maximum negative control B/A (max ncB/A)  
551 value and converted all ncB/A values to ratios ( $R=(\text{max ncB/A})/(\text{ncB/A})$ , **S-Table 1, Step**  
552 **3**).

553  
554 Next, the tB/A value was multiplied by the R value, such that an under-estimated  
555 brightness signal due to non-specific staining (i.e., low B/A value) was rectified  
556 proportionally to the relative degree of non-specific staining ( $tB/A^{\text{adj}}=(tB/A)*R$ , **S-Table 1,**  
557 **Step 4**).

558  
559 As staining intensity is inversely proportional to the  $tB/A^{\text{adj}}$  value, greater gold staining  
560 indicates that less light penetrates a section. The inverse value of  $tB/A^{\text{adj}}$  was calculated  
561 ( $1/(tB/A^{\text{adj}})$ , **S-Table 1, Step 5**) and multiplied by  $10^3$  to express values above the  
562 decimal point.

## 563 564 **EM analyses**

565 Two- to three-month-old male mice were anesthetized using 4-5% isoflurane in a  
566 chamber, and anesthesia was maintained with 2.0-3.5% isoflurane using a nose-cone

567 vaporizer. The animals were intracardially perfused with 100 mL of 0.9% physiological  
568 saline followed by approximately 250 mL of freshly prepared 0.1 M sodium cacodylate  
569 buffer (pH 7.4; Electron Microscopy Sciences cat #11653), which contained 2.5%  
570 glutaraldehyde (Electron Microscopy Sciences cat #16320) and 2.5% PFA (Electron  
571 Microscopy Sciences cat #19202). Next, the brains were split into two hemispheres and  
572 post-fixed in fixative at 4°C for 2 weeks. Samples from the target areas (fimbria and  
573 corpus callosum) were obtained using a vibratome and placed in 0.1 M sodium  
574 cacodylate buffer overnight. The tissues were then rinsed three times for 10 min each  
575 in 0.1 M cacodylate buffer to remove aldehydes, following which they were placed in a  
576 mixture (500  $\mu$ L) of 2% OsO<sub>4</sub> (Electron Microscopy Sciences, cat#19150) and 0.1 M  
577 sodium cacodylate buffer for 1 h. The tissue samples were agitated and shaken, rinsed  
578 (3 x 5 min 0.1 M Na cacodylate), and dehydrated twice in a series of ice-cold ethanol  
579 solutions for 5 min each (30% ethanol; 50% ethanol; 70% ethanol; 90% ethanol; 95%  
580 ethanol) and three times in 100% ethanol for 10 min. Next, the tissues were rinsed twice  
581 in propylene oxide for 30 min each (Polysciences, Inc., cat# 00236–1). This was followed  
582 by incubation on a mixer at room temperature overnight in an approximately 1 mL  
583 mixture of 1 part propylene oxide and 1 part Polybed resin solution (Poly/Bed® 812  
584 Embedding Media, Polysciences, Inc., cat# 08791–500; Dodecenylsuccinic anhydride  
585 (DDSA, Polysciences Inc., cat# 00563–450), nadic methyl anhydride (NMA,  
586 Polysciences Inc., cat# 00886–500), and 2,4,6-Tris-(dimethylaminomethyl)phenol (DMP-  
587 30, Polysciences, Inc., cat# 00553–100). On the next day, the Polybed resin/propylene  
588 oxide solution was removed, and the tissues were incubated for 24 h in 100% Polybed  
589 solution on a mixer at room temperature. Tissues were removed from the Polybed resin  
590 and placed in a mold, following which fresh polyresin was added. After the resulting  
591 bubbles had disappeared, the tissues in the mold were incubated at 55°C for 36 h.

592 Subsequently, they were processed at the Electron Microscopy Laboratory of the UT  
593 Health Science Center in San Antonio using the in-house procedure (86). The tissues  
594 were cut at 1  $\mu\text{m}$  and stained using 0.1% toluidine blue/0, 0.1% methylene blue/0, and  
595 0.1% azure II in 1% sodium borate buffer. Next, 100-nm thick sections were cut and  
596 collected on 300 hexagonal mesh copper grids (Electron Microscopy Sciences, cat #  
597 T300H-Cu). In each set of five grids, three were stained, and two were left unstained.  
598 Staining was performed using 5% uranyl acetate in 50% methanol and Reynold's lead  
599 citrate (87). We measured the diameters of myelinated axons and their axon portions.

600

#### 601 **qRT-PCR**

602 We used 2-3 month-old female *Tbx1*  $+/+$  and  $+/-$  littermates. Total RNA was extracted  
603 from brain regions of adult mice using an RNeasy Plus Mini Kit (Cat#74134, Qiagen,  
604 Germantown, USA), in accordance with the manufacturer's instructions. cDNA was  
605 synthesized from total RNA using SuperScript IV VILO master mix (Cat# 11766050,  
606 Invitrogen, Carlsbad, USA). Quantitative PCR reactions were performed in triplicate on  
607 QuantStudio 6 Flex Real-Time PCR Systems (Cat#4485694, Applied Biosystems,  
608 Waltham, USA) using the TaqMan Fast Advanced Master Mix (Cat#4444963, Applied  
609 Biosystems, Waltham, USA). The Taqman probes are listed in the Supplementary  
610 Material (**Table S3**). Data were analyzed using the  $\Delta\Delta\text{Ct}$  method and normalized to the  
611 reference gene *Cyc1*.

612

#### 613 ***In vitro* analysis of oligodendrocytes**

614 We used P21 +/+ (n =9) and +/- mice (n = 5) chosen from five litters. Progenitor cells  
615 were isolated from the lateral ventricular walls of both hemispheres. Two 1mm slices  
616 were taken from each of both hemispheres, and tissues that include the subventricular  
617 zone were dissected. Each culture was prepared using tissue from a single mouse. The  
618 tissues were dissociated using a Neural Tissue Dissociation Kit (P) (130-092-628,  
619 Miltenyi Biotech GmbH, Germany). We did not purify neural progenitor cells with  
620 antibodies; thus, our cells contained different types of proliferating progenitor cells that  
621 generate neurons and oligodendrocytes. The cells were cultured in a medium  
622 (DMEM/F12 [11320–033, Gibco, CA, USA]) supplemented with N2 (17502048, Gibco),  
623 B27 (17504044, Gibco), epidermal growth factor (EGF) (20 ng/ml) (AF100-15,  
624 Peprotech, NJ, USA), and fibroblast growth factor 2 (FGF2) (10 ng/ml) (100-10B,  
625 Peprotech). After two to three passages, the cells were dissociated from the spheres and  
626 seeded on a Matrigel (356234, BD Biosciences, Bedford MA, USA)-coated slide  
627 chamber (154534, Nunc, NY, USA). To promote differentiation, the cells were cultured  
628 for 4 days in medium supplemented with 5% fetal calf serum. Next, the cells were fixed  
629 using 4% PFA for 15 min and processed for immunofluorescence staining, using a  
630 purified mouse monoclonal O-4 antibody (1:50, MAB345, Millipore, MA, USA) for 12 h at  
631 4°C after blocking for 30 min at room temperature with 5% donkey serum (S30-100ml,  
632 Millipore, MA, USA). Subsequently, the cells were incubated for 30 min at room  
633 temperature with Goat anti-Mouse IgM (Heavy Chain) Secondary Antibody, Alexa Fluor  
634 647 (1:1000, A21238, Molecular Probes, OR USA). Nucleus staining was performed  
635 using 4',6-diamidino-2-phenylindole (DAPI) (3 mM, D3571, Molecular Probes). Cells  
636 were counted from four randomly selected fields per culture under a confocal microscope  
637 (TCS SP8, Leica, Germany), and the average score was obtained.

639 **Behavioral analysis**

640 The mice were tested during the light phase between 10 AM and 5 PM.

641 Morris water maze. Separate groups of 2-month-old male mice were used for the hidden  
642 and visible platform versions of the Morris water maze test. The water tank (103 cm in  
643 diameter; ~914 lx) contained white Prang® (Dixon Ticonderoga®) Ready-to-Use Paint (  
644 Item #: 738062, Model #: 21609/21949, Staples) mixed in water ( $24 \pm 2^\circ\text{C}$ ). A circular  
645 platform (10 cm in diameter) was submerged 1 cm below the surface in the middle of  
646 one quadrant. Cues were placed on the wall 40 cm from the tank edge. The water was  
647 changed after testing on days 3 and 5.

648

649 The hidden platform version involved 10 sessions conducted over 5 days (two daily  
650 sessions at intervals of 2–4 hours). Each session included four 60-s trials conducted at  
651 15-min intervals. The platform location remained constant (Quadrant 4); however, the  
652 entry points were semi-randomly changed across the trials. Before the fourth day of the  
653 hidden platform training, we performed a 60-s probe trial for which the platform was  
654 removed. The entry point for the probe trials was the quadrant opposite to the target  
655 quadrant. An additional probe trial was conducted 72 h after the fifth day of hidden-  
656 platform training.

657

658 The cued platform version involved six sessions conducted over 3 days (two daily  
659 sessions at intervals of 2–4 h with each session having two 60-s trials at 15-min  
660 intervals). The platform was marked using a flag placed above the water surface and  
661 visible to the mice. The platform locations were randomly assigned to each trial. The  
662 mice were placed in the maze from four equally spaced points along the pool perimeter,  
663 and the entry-point sequence was randomly chosen. For each placement, the animals

664 were placed facing the sidewalls. The sequence of four start positions (north, south,  
665 east, and west) varied across the trials.

666

667 In both the hidden and cued platform versions, all animals were allowed to remain on the  
668 platform for 30 s. In case they did not reach the platform during the 60-s test, the  
669 experimenter placed and left the animal on the platform for 30 s. During the 15-min inter-  
670 trial interval, the mouse was dried using a paper towel and placed in an empty cage  
671 stuffed with a dry paper towel.

672

673 Attentional set shifting: This test was performed using a procedure optimized for mice (59),  
674 with a slight modification. Two- to three-month-old male mice were individually housed and  
675 food-deprived to reduce the bodyweight to 85% of the *ad libitum* feeding weight, and this  
676 bodyweight was maintained throughout the testing period.

677

678 The mice were taken to the test room 1 h before the start of the training session. A single  
679 bowl containing 1/2 of a Honey Nut Cheerio buried in one medium stimulus sprinkled  
680 with an odor stimulus was placed in the home cage. This training used all possible  
681 combinations of exemplars of both dimensions (i.e., odor and medium) for subsequent  
682 use in the eight phases of attentional set shifting. The mice completed four daily trials,  
683 each involving a unique combination of medium and odor stimuli. The bowl was  
684 immediately removed from the home cage after the mouse had dug up the food pellet  
685 and eaten it. Each trial lasted approximately 1–2 min. After completing the daily training  
686 trials, the mouse was placed in a new home cage with fresh bedding.

687

688 Next, we conducted a one-day habituation session in the attentional set-shifting  
689 apparatus (outer dimensions: height (H), 15 cm x width (W), 19.2 cm x length (L), 49.2  
690 cm; inner dimensions: H, 14.4 cm x W, 18.3 cm x L, 48.3 cm; ~914 lux). The apparatus  
691 was divided into two goal compartments (W, 9 cm x L, 14 cm each) and one start  
692 compartment (W, 18.3 cm x L, 33.9 cm) using 4.8-mm-thick walls. The mouse explored  
693 the apparatus arena, which included a plastic weigh boat containing water in the start  
694 compartment. The two goal compartments lacked bowls. After 3 minutes, the partition  
695 door was placed to confine the mouse to the start compartment. After another 3 minutes,  
696 the door was removed to allow the mouse to freely explore all three compartments. The  
697 two 3-min sessions were repeated five times.

698  
699 On the next day, training began in the attentional set-shifting session apparatus. The  
700 water tray remained in the starting compartment during testing and initial re-training. The  
701 two bowls in the goal compartments contained two medium stimuli (e.g., alpha dri and  
702 paper chips) without odor stimuli; moreover, they were both baited using food. Both  
703 media were used for the subsequent SD sessions. The partition door was placed to  
704 confine the mouse to the start compartment. Care was taken to remove the door when  
705 the mouse was not sniffing or facing it. Initially, the mice underwent four re-training trials  
706 to retrieve the food from the bowl. The positions of both medium-containing bowls were  
707 randomized in each trial. We placed an eighth of a Honey Nut Cheerio on top of (trial 1),  
708 half-buried within (trial 2), slightly covered by (trial 3), and completely buried within (trial  
709 4) the media. Each trial ended when the mouse had eaten food from both bowls.

710  
711 Subsequently, the mice underwent a series of discrimination tests. Initially, each mouse  
712 was placed in the start compartment with a partition door. The two goal compartments

713 contained one baited bowl (an eighth of a Cheerio piece completely buried in the  
714 medium) and one un-baited bowl; moreover, the position of the baited bowl was  
715 randomized across the trials. The partition door was then lifted. Each trial ended when  
716 the mouse had made a correct choice and had eaten the reward. If the mouse dug into  
717 the un-baited bowl, it was removed after the mouse had spontaneously left the un-baited  
718 compartment. A time-out was given if the mouse did not dig in any bowl for 3 min, which  
719 involved removal of the bowl from the test arena and subsequent resumption of the trial  
720 using a different medium/odor pair. In case of three consecutive time-outs, the testing  
721 was ended and resumed the next day. Each of the eight phases ended when the mouse  
722 had made eight consecutive correct choices or after 50 trials per day, whichever came  
723 first. If a mouse made eight consecutive correct choices within 50 trials, a new phase  
724 was administered the next day. After each test trial and when changing mice, the arena  
725 and bowls were wiped using 70% ethanol.

726  
727 The attentional set-shifting phases were as follows (**Tables S4** and **S5**). For the SD  
728 phase, there were two choices for the two relevant dimensions. The compound  
729 discrimination (CD) phase was similar to the SD phase, except that a new correct  
730 compound (O1&M1 and O1&M2) was added. The IDS IV phase involved CD using two  
731 novel exemplars from relevant and irrelevant dimensions for each IDS with the same  
732 relevance. The IDS IV rev phase involved the same exemplar set as the IDS IV phase,  
733 except that the correct choice within the relevant dimension was reversed. The  
734 extradimensional shifting (EDS) phase involved novel CD, except that the correct choice  
735 was an exemplar of the previously irrelevant dimension up to IDS-IV rev. The order of  
736 discrimination and exemplars was similar for all mice. The exemplar choice and correct  
737 bowl position were pre-determined using a random number table.



738

739 The standard mouse SD procedure uses O1 plus M1 and O2 plus M1 (59). Our modified  
740 SD procedure used a combination of two dimensions (O1 plus M1 as the correct  
741 discriminants and O2 plus M2 as the incorrect discriminants). Our pilot study indicated  
742 that, compared with +/+ mice, +/- mice exhibited a longer latency to complete this  
743 modified task.

744

745 We determined the number of trials taken to reach eight consecutive correct choices and  
746 the latency to complete a trial from the trial start to the time point when the mice began  
747 eating the food pellet.

748

749 Olfactory responses to social and non-social cues. This test was conducted in a test cage  
750 (L, 28.5 cm × W, 17.5 cm × H, 12.5 cm) that had been divided into a 19.5 cm-long  
751 compartment and a 9 cm-long compartment using a partition wall with a 5 cm (H) × 5 cm  
752 (W) opening; ~430 lux. The test was conducted as previously described (24), with slight  
753 modifications. First, 2-month-old male mice were habituated to the apparatus for 15 min.  
754 A filter paper scented with a test odor was placed in a 1-ml Eppendorf tube containing  
755 small holes in the cap. Odors were sequentially tested as follows: water, almond, banana,  
756 urine from one non-littermate C57BL/6J male (NL1), urine from another non-littermate  
757 C57BL/6J male (NL2), urine from the first C57BL/6N mouse (NL1), urine from a non-  
758 littermate male +/- mouse (HT), urine from the dam (rm), urine from another litter's mother  
759 (am), and urine from a non-littermate virgin female C57BL/6J mouse (v). We measured  
760 sniffing of the tube containing odorant-soaked filter paper during the 2-min trials. The mice  
761 underwent three 2-min trials for each odorant with an inter-trial interval of approximately  
762 10 s; moreover, there was a 10-s interval between the three-trial session of one odorant  
763 and that of another. Urine was collected before testing and frozen at -20 °C until the test

764 day. An Eppendorf tube with seven holes (one in the middle and six surrounding) in the  
765 cap was used for each trial. The tube was attached to the cage wall using Velcro. The filter  
766 paper (Whatman, #3698-325, Maidstone England) was soaked in 10  $\mu$ l of each odorant.  
767 During habituation, we placed dry filter paper in the tube.

768

## 769 **Statistical analysis**

770 We used GraphPad Prism 8.3.0 (GraphPad Software, San Diego, CA) and  
771 IBM SPSS Statistics 26.0.0.0, IBM, Armonk, NY). Among-group and between-group  
772 comparisons of the data were performed using analyses of variance and Student's t-test,  
773 respectively. Normality and variance homogeneity of the data were evaluated using the  
774 Shapiro-Wilk test and Levene's homogeneity of variance test, respectively. In case either  
775 assumption was violated, data were analyzed using a generalized linear mixed model or  
776 Mann-Whitney U-tests and Wilcoxon non-parametric tests for unpaired and paired data,  
777 respectively. The number of cases was analyzed using the  $\chi^2$  test. The minimum  
778 significance level was set at 5%. In case multiple tests were applied for a data set, the  
779 significance level was adjusted using the Benjamini-Hochberg correction, with a false  
780 discovery rate of 5%.

781

782

783 **References**

784

- 785 1. D. Malhotra, J. Sebat, CNVs: harbingers of a rare variant revolution in psychiatric  
786 genetics. *Cell* **148**, 1223-1241 (2012).
- 787 2. G. Kirov, E. Rees, J. T. Walters, V. Escott-Price, L. Georgieva, A. L. Richards, K. D.  
788 Chambert, G. Davies, S. E. Legge, J. L. Moran, S. A. McCarroll, M. C. O'Donovan, M. J.  
789 Owen, The Penetrance of Copy Number Variations for Schizophrenia and Developmental  
790 Delay. *Biol. Psychiatry* **75**, 378-385 (2013).
- 791 3. H. Stefansson, A. Meyer-Lindenberg, S. Steinberg, B. Magnusdottir, K. Morgen, S.  
792 Arnarsdottir, G. Bjornsdottir, G. B. Walters, G. A. Jonsdottir, O. M. Doyle, H. Tost, O.  
793 Grimm, S. Kristjansdottir, H. Snorrason, S. R. Davidsdottir, L. J. Gudmundsson, G. F.  
794 Jonsson, B. Stefansson, I. Helgadóttir, M. Haraldsson, B. Jonsdottir, J. H. Thygesen, A.  
795 J. Schwarz, M. Didriksen, T. B. Stensbol, M. Brammer, S. Kapur, J. G. Halldorsson, S.  
796 Hreidarsson, E. Saemundsen, E. Sigurdsson, K. Stefansson, CNVs conferring risk of  
797 autism or schizophrenia affect cognition in controls. *Nature* **505**, 361-366 (2014).
- 798 4. F. K. Satterstrom, J. A. Kosmicki, J. Wang, M. S. Breen, S. De Rubeis, J. Y. An, M. Peng,  
799 R. Collins, J. Grove, L. Klei, C. Stevens, J. Reichert, M. S. Mulhern, M. Artomov, S.  
800 Gerges, B. Sheppard, X. Xu, A. Bhaduri, U. Norman, H. Brand, G. Schwartz, R. Nguyen,  
801 E. E. Guerrero, C. Dias, C. Autism Sequencing, P.-B. C. i, C. Betancur, E. H. Cook, L.  
802 Gallagher, M. Gill, J. S. Sutcliffe, A. Thurm, M. E. Zwick, A. D. Borglum, M. W. State,  
803 A. E. Cicek, M. E. Talkowski, D. J. Cutler, B. Devlin, S. J. Sanders, K. Roeder, M. J.  
804 Daly, J. D. Buxbaum, Large-Scale Exome Sequencing Study Implicates Both  
805 Developmental and Functional Changes in the Neurobiology of Autism. *Cell* **180**, 568-584  
806 e523 (2020).
- 807 5. S. J. Sanders, X. He, A. J. Willsey, A. G. Ercan-Sencicek, K. E. Samocha, A. E. Cicek, M.  
808 T. Murtha, V. H. Bal, S. L. Bishop, S. Dong, A. P. Goldberg, C. Jinlu, J. F. Keaney, III, L.  
809 Klei, J. D. Mandell, D. Moreno-De-Luca, C. S. Poultney, E. B. Robinson, L. Smith, T.  
810 Solli-Nowlan, M. Y. Su, N. A. Teran, M. F. Walker, D. M. Werling, A. L. Beaudet, R. M.  
811 Cantor, E. Fombonne, D. H. Geschwind, D. E. Grice, C. Lord, J. K. Lowe, S. M. Mane, D.  
812 M. Martin, E. M. Morrow, M. E. Talkowski, J. S. Sutcliffe, C. A. Walsh, T. W. Yu, D. H.  
813 Ledbetter, C. L. Martin, E. H. Cook, J. D. Buxbaum, M. J. Daly, B. Devlin, K. Roeder, S.  
814 MW, Insights into Autism Spectrum Disorder Genomic Architecture and Biology from 71  
815 Risk Loci. *Neuron* **87**, 1215-1233 (2015).
- 816 6. I. Mitra, B. Huang, N. Mousavi, N. Ma, M. Lamkin, R. Yanicky, S. Shleizer-Burko, K. E.  
817 Lohmueller, M. Gymrek, Patterns of de novo tandem repeat mutations and their role in  
818 autism. *Nature* **589**, 246-250 (2021).
- 819 7. R. J. Shprintzen, R. Goldberg, K. J. Golding-Kushner, R. W. Marion, Late-onset psychosis  
820 in the velo-cardio-facial syndrome. *American Journal of Medical Genetics* **42**, 141-142  
821 (1992).
- 822 8. J. Zinkstok, E. Boot, A. S. Bassett, N. Hiroi, N. J. Butcher, C. Vingerhoets, J. A. S.  
823 Vorstman, T. A. M. J. van Amelsvoort, The 22q11.2 deletion syndrome from a  
824 neurobiological perspective. *Lancet Psychiatry* **6**, 951-960. (2019).
- 825 9. R. E. Gur, J. J. Yi, D. M. Donald-McGinn, S. X. Tang, M. E. Calkins, D. Whinna, M. C.  
826 Souders, A. Savitt, E. H. Zackai, P. J. Moberg, B. S. Emanuel, R. C. Gur, Neurocognitive  
827 development in 22q11.2 deletion syndrome: comparison with youth having developmental  
828 delay and medical comorbidities. *Mol. Psychiatry* **19**, 1205-1211 (2014).

- 829 10. K. M. Kendall, M. Bracher-Smith, H. Fitzpatrick, A. Lynham, E. Rees, V. Escott-Price,  
830 M. J. Owen, M. C. O'Donovan, J. T. R. Walters, G. Kirov, Cognitive performance and  
831 functional outcomes of carriers of pathogenic copy number variants: analysis of the UK  
832 Biobank. *Br J Psychiatry* **214**, 297-304 (2019).
- 833 11. S. Chawner, M. J. Owen, P. Holmans, F. L. Raymond, D. Skuse, J. Hall, M. B. M. van den  
834 Bree, Genotype-phenotype associations in children with copy number variants associated  
835 with high neuropsychiatric risk in the UK (IMAGINE-ID): a case-control cohort study.  
836 *Lancet Psychiatry* **6**, 493-505 (2019).
- 837 12. R. C. Gur, M. E. Calkins, T. D. Satterthwaite, K. Ruparel, W. B. Bilker, T. M. Moore, A.  
838 P. Savitt, H. Hakonarson, R. E. Gur, Neurocognitive growth charting in psychosis  
839 spectrum youths. *JAMA Psychiatry* **71**, 366-374 (2014).
- 840 13. J. A. Vorstman, E. J. Breetvelt, S. N. Duijff, S. Eliez, M. Schneider, M. Jalbrzikowski, M.  
841 Armando, S. Vicari, V. Shashi, S. R. Hooper, E. W. Chow, W. L. Fung, N. J. Butcher, D.  
842 A. Young, D. M. McDonald-McGinn, A. Vogels, T. van Amelsvoort, D. Gothelf, R.  
843 Weinberger, A. Weizman, P. W. Klaassen, S. Koops, W. R. Kates, K. M. Antshel, T. J.  
844 Simon, O. Y. Ousley, A. Swillen, R. E. Gur, C. E. Bearden, R. S. Kahn, A. S. Bassett, B.  
845 International Consortium on, S. Behavior in 22q11.2 Deletion, Cognitive decline  
846 preceding the onset of psychosis in patients with 22q11.2 deletion syndrome. *JAMA*  
847 *Psychiatry* **72**, 377-385 (2015).
- 848 14. P. M. Thompson, N. Jahanshad, C. R. K. Ching, L. E. Salminen, S. I. Thomopoulos, J.  
849 Bright, B. T. Baune, S. Bertolin, J. Bralten, W. B. Bruin, R. Bulow, J. Chen, Y. Chye, U.  
850 Dannlowski, C. G. F. de Kovel, G. Donohoe, L. T. Eyler, S. V. Faraone, P. Favre, C. A.  
851 Filippi, T. Frodl, D. Garijo, Y. Gil, H. J. Grabe, K. L. Grasby, T. Hajek, L. K. M. Han, S.  
852 N. Hatton, K. Hilbert, T. C. Ho, L. Holleran, G. Homuth, N. Hosten, J. Houenou, I.  
853 Ivanov, T. Jia, S. Kelly, M. Klein, J. S. Kwon, M. A. Laansma, J. Leerssen, U. Lueken, A.  
854 Nunes, J. O. Neill, N. Opel, F. Piras, F. Piras, M. C. Postema, E. Pozzi, N. Shatokhina, C.  
855 Soriano-Mas, G. Spalletta, D. Sun, A. Teumer, A. K. Tilot, L. Tozzi, C. van der Merwe, E.  
856 J. W. Van Someren, G. A. van Wingen, H. Volzke, E. Walton, L. Wang, A. M. Winkler,  
857 K. Wittfeld, M. J. Wright, J. Y. Yun, G. Zhang, Y. Zhang-James, B. M. Adhikari, I.  
858 Agartz, M. Aghajani, A. Aleman, R. R. Althoff, A. Altmann, O. A. Andreassen, D. A.  
859 Baron, B. L. Bartnik-Olson, J. Marie Bas-Hoogendam, A. R. Baskin-Sommers, C. E.  
860 Bearden, L. A. Berner, P. S. W. Boedhoe, R. M. Brouwer, J. K. Buitelaar, K.  
861 Caeyenberghs, C. A. M. Cecil, R. A. Cohen, J. H. Cole, P. J. Conrod, S. A. De Brito, S.  
862 M. C. de Zwarte, E. L. Dennis, S. Desrivieres, D. Dima, S. Ehrlich, C. Esopenko, G.  
863 Fairchild, S. E. Fisher, J. P. Fouche, C. Francks, S. Frangou, B. Franke, H. P. Garavan, D.  
864 C. Glahn, N. A. Groenewold, T. P. Gurholt, B. A. Gutman, T. Hahn, I. H. Harding, D.  
865 Hernaus, D. P. Hibar, F. G. Hillary, M. Hoogman, H. E. Hulshoff Pol, M. Jalbrzikowski,  
866 G. A. Karkashadze, E. T. Klapwijk, R. C. Knickmeyer, P. Kochunov, I. K. Koerte, X. Z.  
867 Kong, S. L. Liew, A. P. Lin, M. W. Logue, E. Luders, F. Macciardi, S. Mackey, A. R.  
868 Mayer, C. R. McDonald, A. B. McMahon, S. E. Medland, G. Modinos, R. A. Morey, S. C.  
869 Mueller, P. Mukherjee, L. Namazova-Baranova, T. M. Nir, A. Olsen, P. Paschou, D. S.  
870 Pine, F. Pizzagalli, M. E. Renteria, J. D. Rohrer, P. G. Samann, L. Schmaal, G. Schumann,  
871 M. S. Shiroishi, S. M. Sisodiya, D. J. A. Smit, I. E. Sonderby, D. J. Stein, J. L. Stein, M.  
872 Tahmasian, D. F. Tate, J. A. Turner, O. A. van den Heuvel, N. J. A. van der Wee, Y. D.  
873 van der Werf, T. G. M. van Erp, N. E. M. van Haren, D. van Rooij, L. S. van Velzen, I. M.  
874 Veer, D. J. Veltman, J. E. Villalon-Reina, H. Walter, C. D. Whelan, E. A. Wilde, M.  
875 Zarei, V. Zelman, E. Consortium, ENIGMA and global neuroscience: A decade of large-  
876 scale studies of the brain in health and disease across more than 40 countries. *Transl*  
877 *Psychiatry* **10**, 100 (2020).

- 878 15. J. E. Villalon-Reina, K. Martinez, X. Qu, C. R. K. Ching, T. M. Nir, D. Kothapalli, C.  
879 Corbin, D. Sun, A. Lin, J. K. Forsyth, L. Kushan, A. Vajdi, M. Jalbrzikowski, L. Hansen,  
880 R. K. Jonas, T. van Amelsvoort, G. Bakker, W. R. Kates, K. M. Antshel, W. Fremont, L.  
881 E. Campbell, K. L. McCabe, E. Daly, M. Gudbrandsen, C. M. Murphy, D. Murphy, M.  
882 Craig, B. Emanuel, D. M. McDonald-McGinn, J. A. S. Vorstman, A. M. Fiksinski, S.  
883 Koops, K. Ruparel, D. Roalf, R. E. Gur, J. Eric Schmitt, T. J. Simon, N. J. Goodrich-  
884 Hunsaker, C. A. Durdle, J. L. Doherty, A. C. Cunningham, M. van den Bree, D. E. J.  
885 Linden, M. Owen, H. Moss, S. Kelly, G. Donohoe, K. C. Murphy, C. Arango, N.  
886 Jahanshad, P. M. Thompson, C. E. Bearden, Altered white matter microstructure in  
887 22q11.2 deletion syndrome: a multisite diffusion tensor imaging study. *Mol Psychiatry* **25**,  
888 2818-2831 (2020).
- 889 16. P. Kochunov, L. E. Hong, E. L. Dennis, R. A. Morey, D. F. Tate, E. A. Wilde, M. Logue,  
890 S. Kelly, G. Donohoe, P. Favre, J. Houenou, C. R. K. Ching, L. Holleran, O. A.  
891 Andreassen, L. S. van Velzen, L. Schmaal, J. E. Villalon-Reina, C. E. Bearden, F. Piras,  
892 G. Spalletta, O. A. van den Heuvel, D. J. Veltman, D. J. Stein, M. C. Ryan, Y. Tan, T. G.  
893 M. van Erp, J. A. Turner, L. Haddad, T. M. Nir, D. C. Glahn, P. M. Thompson, N.  
894 Jahanshad, ENIGMA-DTI: Translating reproducible white matter deficits into  
895 personalized vulnerability metrics in cross-diagnostic psychiatric research. *Hum Brain*  
896 *Mapp*, (2020).
- 897 17. W. Gong, S. Gottlieb, J. Collins, A. Blescia, H. Dietz, E. Goldmuntz, D. M. Donald-  
898 McGinn, E. H. Zackai, B. S. Emanuel, D. A. Driscoll, M. L. Budarf, Mutation analysis of  
899 TBX1 in non-deleted patients with features of DGS/VCFS or isolated cardiovascular  
900 defects. *J. Med. Genet* **38**, E45 (2001).
- 901 18. K. Hasegawa, H. Tanaka, Y. Higuchi, Y. Hayashi, K. Kobayashi, H. Tsukahara, Novel  
902 heterozygous mutation in TBX1 in an infant with hypocalcemic seizures. *Clin Pediatr*  
903 *Endocrinol* **27**, 159-164 (2018).
- 904 19. T. Ogata, T. Niihori, N. Tanaka, M. Kawai, T. Nagashima, R. Funayama, K. Nakayama,  
905 S. Nakashima, F. Kato, M. Fukami, Y. Aoki, Y. Matsubara, TBX1 mutation identified by  
906 exome sequencing in a Japanese family with 22q11.2 deletion syndrome-like craniofacial  
907 features and hypocalcemia. *PLoS. One* **9**, e91598 (2014).
- 908 20. R. Paylor, B. Glaser, A. Mupo, P. Ataliotis, C. Spencer, A. Sobotka, C. Sparks, C. H.  
909 Choi, J. Oghalai, S. Curran, K. C. Murphy, S. Monks, N. Williams, M. C. O'Donovan, M.  
910 J. Owen, P. J. Scambler, E. Lindsay, Tbx1 haploinsufficiency is linked to behavioral  
911 disorders in mice and humans: implications for 22q11 deletion syndrome. *Proc. Natl.*  
912 *Acad. Sci. U. S. A* **103**, 7729-7734 (2006).
- 913 21. N. Hiroi, H. Zhu, M. Lee, B. Funke, M. Arai, M. Itokawa, R. Kucherlapati, B. Morrow, T.  
914 Sawamura, S. Agatsuma, A 200-kb region of human chromosome 22q11.2 confers  
915 antipsychotic-responsive behavioral abnormalities in mice. *Proceedings of the National*  
916 *Academy of Sciences of the United States of America* **102**, 19132-19137 (2005).
- 917 22. G. Suzuki, K. M. Harper, T. Hiramoto, B. Funke, M. Lee, G. Kang, M. Buell, M. A.  
918 Geyer, R. Kucherlapati, B. Morrow, P. T. Mannisto, S. Agatsuma, N. Hiroi, Over-  
919 expression of a human chromosome 22q11.2 segment including TXNRD2, COMT and  
920 ARVCF developmentally affects incentive learning and working memory in mice. *Human*  
921 *Molecular Genetics* **18**, 3914-3925 (2009).
- 922 23. G. Suzuki, K. M. Harper, T. Hiramoto, T. Sawamura, M. Lee, G. Kang, K. Tanigaki, M.  
923 Buell, M. A. Geyer, W. S. Trimble, S. Agatsuma, N. Hiroi, Sept5 deficiency exerts  
924 pleiotropic influence on affective behaviors and cognitive functions in mice. *Human*  
925 *Molecular Genetics* **18**, 1652-1660 (2009).



- 926 24. T. Hiramoto, G. Kang, G. Suzuki, Y. Satoh, R. Kucherlapati, Y. Watanabe, N. Hiroi,  
927 Tbx1: identification of a 22q11.2 gene as a risk factor for autism spectrum disorder in a  
928 mouse model. *Hum Mol Genet* **20**, 4775-4785 (2011).
- 929 25. K. M. Harper, T. Hiramoto, K. Tanigaki, G. Kang, G. Suzuki, W. Trimble, N. Hiroi,  
930 Alterations of social interaction through genetic and environmental manipulation of the  
931 22q11.2 gene Sept5 in the mouse brain. *Human Molecular Genetics* **21**, 3489-3499  
932 (2012).
- 933 26. N. Hiroi, T. Takahashi, A. Hishimoto, T. Izumi, S. Boku, T. Hiramoto, Copy Number  
934 Variation at 22q11.2: from rare variants to common mechanisms of developmental  
935 neuropsychiatric disorders. *Mol. Psychiatry* **18**, 1153-1165 (2013).
- 936 27. T. Takahashi, S. Okabe, P. O. Broin, A. Nishi, K. Ye, M. V. Beckert, T. Izumi, A.  
937 Machida, G. Kang, S. Abe, J. L. Pena, A. Golden, T. Kikusui, N. Hiroi, Structure and  
938 function of neonatal social communication in a genetic mouse model of autism. *Mol*  
939 *Psychiatry* **21**, 1208-1214 (2016).
- 940 28. S. Boku, T. Izumi, S. Abe, T. Takahashi, A. Nishi, H. Nomaru, Y. Naka, G. Kang, M.  
941 Nagashima, A. Hishimoto, S. Enomoto, G. Duran-Torres, K. Tanigaki, J. Zhang, K. Ye, S.  
942 Kato, P. T. Mannisto, K. Kobayashi, N. Hiroi, Copy number elevation of 22q11.2 genes  
943 arrests the developmental maturation of working memory capacity and adult neurogenesis.  
944 *Molecular Psychiatry* **23**, 985-992 (2018).
- 945 29. N. Hiroi, T. Yamauchi, Modeling and Predicting Developmental Trajectories of  
946 Neuropsychiatric Dimensions Associated With Copy Number Variations. *Int J*  
947 *Neuropsychopharmacol* **22**, 488-500 (2019).
- 948 30. R. Kato, A. Machida, K. Nomoto, G. Kang, T. Hiramoto, K. Tanigaki, K. Mogi, N. Hiroi,  
949 T. Kikusui, Maternal approach behaviors toward neonatal calls are impaired by mother's  
950 experiences of raising pups with a risk gene variant for autism. *Dev Psychobiol* **63**, 108-  
951 113 (2021).
- 952 31. Y. Ma, P. R. Hof, S. C. Grant, S. J. Blackband, R. Bennett, L. Slate, M. D. McGuigan,  
953 H. Benveniste, A three-dimensional digital atlas database of the adult C57BL/6J mouse  
954 brain by magnetic resonance microscopy. *Neuroscience* **135**, 1203-1215 (2005).
- 955 32. A. Lazari, I. Lipp, Can MRI measure myelin? Systematic review, qualitative assessment,  
956 and meta-analysis of studies validating microstructural imaging with myelin histology.  
957 *Neuroimage*, 117744 (2021).
- 958 33. E. H. Chang, M. Argyelan, M. Aggarwal, T. S. Chandon, K. H. Karlsgodt, S. Mori, A. K.  
959 Malhotra, The role of myelination in measures of white matter integrity: Combination of  
960 diffusion tensor imaging and two-photon microscopy of CLARITY intact brains.  
961 *Neuroimage* **147**, 253-261 (2017).
- 962 34. C. Sampaio-Baptista, A. A. Khrapitchev, S. Foxley, T. Schlagheck, J. Scholz, S. Jbabdi,  
963 G. C. DeLuca, K. L. Miller, A. Taylor, N. Thomas, J. Kleim, N. R. Sibson, D. Bannerman,  
964 H. Johansen-Berg, Motor skill learning induces changes in white matter microstructure  
965 and myelination. *J Neurosci* **33**, 19499-19503 (2013).
- 966 35. J. M. Soares, P. Marques, V. Alves, N. Sousa, A hitchhiker's guide to diffusion tensor  
967 imaging. *Front Neurosci* **7**, 31 (2013).
- 968 36. L. Schmued, J. Bowyer, M. Cozart, D. Heard, Z. Binienda, M. Paule, Introducing Black-  
969 Gold II, a highly soluble gold phosphate complex with several unique advantages for the  
970 histochemical localization of myelin. *Brain Res* **1229**, 210-217 (2008).
- 971 37. T. Chomiak, B. Hu, What is the optimal value of the g-ratio for myelinated fibers in the rat  
972 CNS? A theoretical approach. *PLoS One* **4**, e7754 (2009).
- 973 38. N. Downes, P. Mullins, The development of myelin in the brain of the juvenile rat.  
974 *Toxicol Pathol* **42**, 913-922 (2014).

- 975 39. F. M. de Vrij, C. G. Bouwkamp, N. Gunhanlar, G. Shpak, B. Lendemeijer, M. Baghdadi,  
976 S. Gopalakrishna, M. Ghazvini, T. M. Li, M. Quadri, S. Olgati, G. J. Breedveld, M.  
977 Coesmans, E. Mientjes, T. de Wit, F. W. Verheijen, H. B. Beverloo, D. Cohen, R. M.  
978 Kok, P. R. Bakker, A. Nijburg, A. T. Spijker, P. M. J. Haffmans, E. Hoencamp, V.  
979 Bergink, G. S. Consortium, J. A. Vorstman, T. Wu, L. M. Olde Loohuis, N. Amin, C. D.  
980 Langen, A. Hofman, W. J. Hoogendijk, C. M. van Duijn, M. A. Ikram, M. W. Vernooij,  
981 H. Tiemeier, A. G. Uitterlinden, Y. Elgersma, B. Distel, J. Gribnau, T. White, V. Bonifati,  
982 S. A. Kushner, Candidate CSPG4 mutations and induced pluripotent stem cell modeling  
983 implicate oligodendrocyte progenitor cell dysfunction in familial schizophrenia. *Mol*  
984 *Psychiatry*, (2018).
- 985 40. M. Fruttiger, L. Karlsson, A. C. Hall, A. Abramsson, A. R. Calver, H. Bostrom, K.  
986 Willetts, C. H. Bertold, J. K. Heath, C. Betsholtz, W. D. Richardson, Defective  
987 oligodendrocyte development and severe hypomyelination in PDGF-A knockout mice.  
988 *Development* **126**, 457-467 (1999).
- 989 41. M. S. Meschkat, A.M.; Weil, M.-T.; Kusch, K.; Jahn, O.; Piepkorn, L.; Agüi-Gonzalez, P.;  
990 Phan, N.T.N.;Ruhwedel, T.; Sadowski, B.; Rizzoli, S.O.; Werner, H.B.; Ehrenreich, H.;  
991 Nave, K.-A.; Möbius, W., White matter integrity requires continuous myelin synthesis at  
992 the inner tongue *bioRxiv*, (2020).
- 993 42. C. Readhead, B. Popko, N. Takahashi, H. D. Shine, R. A. Saavedra, R. L. Sidman, L.  
994 Hood, Expression of a myelin basic protein gene in transgenic shiverer mice: correction of  
995 the dysmyelinating phenotype. *Cell* **48**, 703-712 (1987).
- 996 43. C. Delarasse, P. Daubas, L. T. Mars, C. Vizler, T. Litzemberger, A. Iglesias, J. Bauer, B.  
997 Della Gaspera, A. Schubart, L. Decker, D. Dimitri, G. Roussel, A. Dierich, S. Amor, A.  
998 Dautigny, R. Liblau, D. Pham-Dinh, Myelin/oligodendrocyte glycoprotein-deficient  
999 (MOG-deficient) mice reveal lack of immune tolerance to MOG in wild-type mice. *J Clin*  
1000 *Invest* **112**, 544-553 (2003).
- 1001 44. A. Aguirre, V. Gallo, Postnatal neurogenesis and gliogenesis in the olfactory bulb from  
1002 NG2-expressing progenitors of the subventricular zone. *J Neurosci* **24**, 10530-10541  
1003 (2004).
- 1004 45. E. L. Jackson, J. M. Garcia-Verdugo, S. Gil-Perotin, M. Roy, A. Quinones-Hinojosa, S.  
1005 VandenBerg, A. Alvarez-Buylla, PDGFR alpha-positive B cells are neural stem cells in  
1006 the adult SVZ that form glioma-like growths in response to increased PDGF signaling.  
1007 *Neuron* **51**, 187-199 (2006).
- 1008 46. S. Belachew, R. Chittajallu, A. A. Aguirre, X. Yuan, M. Kirby, S. Anderson, V. Gallo,  
1009 Postnatal NG2 proteoglycan-expressing progenitor cells are intrinsically multipotent and  
1010 generate functional neurons. *J Cell Biol* **161**, 169-186 (2003).
- 1011 47. B. Menn, J. M. Garcia-Verdugo, C. Yaschine, O. Gonzalez-Perez, D. Rowitch, A.  
1012 Alvarez-Buylla, Origin of oligodendrocytes in the subventricular zone of the adult brain. *J*  
1013 *Neurosci* **26**, 7907-7918 (2006).
- 1014 48. F. Ortega, S. Gascon, G. Masserdotti, A. Deshpande, C. Simon, J. Fischer, L. Dimou, D.  
1015 Chichung Lie, T. Schroeder, B. Berninger, Oligodendroglial and neurogenic adult  
1016 subependymal zone neural stem cells constitute distinct lineages and exhibit differential  
1017 responsiveness to Wnt signalling. *Nat Cell Biol* **15**, 602-613 (2013).
- 1018 49. D. K. Jones, M. Cercignani, Twenty-five pitfalls in the analysis of diffusion MRI data.  
1019 *NMR Biomed* **23**, 803-820 (2010).
- 1020 50. M. G. Packard, J. L. McGaugh, Double dissociation of fornix and caudate nucleus lesions  
1021 on acquisition of two water maze tasks: further evidence for multiple memory systems.  
1022 *Behav Neurosci* **106**, 439-446 (1992).

- 1023 51. D. K. Hannesson, R. W. Skelton, Recovery of spatial performance in the Morris water  
1024 maze following bilateral transection of the fimbria/fornix in rats. *Behav Brain Res* **90**, 35-  
1025 56 (1998).
- 1026 52. J. J. Yi, R. Weinberger, T. M. Moore, M. E. Calkins, Y. Guri, D. M. McDonald-McGinn,  
1027 E. H. Zackai, B. S. Emanuel, R. E. Gur, D. Gothelf, R. C. Gur, Performance on a  
1028 computerized neurocognitive battery in 22q11.2 deletion syndrome: A comparison  
1029 between US and Israeli cohorts. *Brain Cogn* **106**, 33-41 (2016).
- 1030 53. P. C. Goldenberg, M. E. Calkins, J. Richard, D. McDonald-McGinn, E. Zackai, N. Mitra,  
1031 B. Emanuel, M. Devoto, K. Borgmann-Winter, C. Kohler, C. G. Conroy, R. C. Gur, R. E.  
1032 Gur, Computerized neurocognitive profile in young people with 22q11.2 deletion  
1033 syndrome compared to youths with schizophrenia and at-risk for psychosis. *Am J Med*  
1034 *Genet B Neuropsychiatr Genet* **159B**, 87-93 (2012).
- 1035 54. C. E. Bearden, M. F. Woodin, P. P. Wang, E. Moss, D. Donald-McGinn, E. Zackai, B.  
1036 Emmanuel, T. D. Cannon, The neurocognitive phenotype of the 22q11.2 deletion  
1037 syndrome: selective deficit in visual-spatial memory. *J. Clin. Exp. Neuropsychol* **23**, 447-  
1038 464 (2001).
- 1039 55. L. J. Drew, K. L. Stark, K. Fenelon, M. Karayiorgou, A. B. Macdermott, J. A. Gogos,  
1040 Evidence for altered hippocampal function in a mouse model of the human 22q11.2  
1041 microdeletion. *Mol Cell Neurosci* **47**, 293-305 (2011).
- 1042 56. D. W. Meechan, H. L. Rutz, M. S. Fralish, T. M. Maynard, L. A. Rothblat, A. S.  
1043 LaMantia, Cognitive ability is associated with altered medial frontal cortical circuits in the  
1044 LgDel mouse model of 22q11.2DS. *Cereb. Cortex* [**Epub ahead of print**], 1143-1151  
1045 (2015).
- 1046 57. A. Tripathi, M. Spedding, E. Schenker, M. Didriksen, A. Cressant, T. M. Jay, Cognition-  
1047 and circuit-based dysfunction in a mouse model of 22q11.2 microdeletion syndrome:  
1048 effects of stress. *Transl Psychiatry* **10**, 41 (2020).
- 1049 58. A. M. Owen, A. C. Roberts, C. E. Polkey, B. J. Sahakian, T. W. Robbins, Extra-  
1050 dimensional versus intra-dimensional set shifting performance following frontal lobe  
1051 excisions, temporal lobe excisions or amygdalo-hippocampectomy in man.  
1052 *Neuropsychologia* **29**, 993-1006 (1991).
- 1053 59. G. B. Bissonette, G. J. Martins, T. M. Franz, E. S. Harper, G. Schoenbaum, E. M. Powell,  
1054 Double dissociation of the effects of medial and orbital prefrontal cortical lesions on  
1055 attentional and affective shifts in mice. *J. Neurosci* **28**, 11124-11130 (2008).
- 1056 60. J. M. Birrell, V. J. Brown, Medial frontal cortex mediates perceptual attentional set  
1057 shifting in the rat. *J. Neurosci* **20**, 4320-4324 (2000).
- 1058 61. M. Jalbrzikowski, C. Carter, D. Senturk, C. Chow, J. M. Hopkins, M. F. Green, A.  
1059 Galvan, T. D. Cannon, C. E. Bearden, Social cognition in 22q11.2 microdeletion  
1060 syndrome: relevance to psychosis? *Schizophr Res* **142**, 99-107 (2012).
- 1061 62. Y. Deng, N. J. Goodrich-Hunsaker, M. Cabaral, D. G. Amaral, M. H. Buonocore, D.  
1062 Harvey, K. Kalish, O. T. Carmichael, C. M. Schumann, A. Lee, R. F. Dougherty, L. M.  
1063 Perry, B. A. Wandell, T. J. Simon, Disrupted fornix integrity in children with chromosome  
1064 22q11.2 deletion syndrome. *Psychiatry Res* **232**, 106-114 (2015).
- 1065 63. R. J. Franklin, C. ffrench-Constant, J. M. Edgar, K. J. Smith, Neuroprotection and repair  
1066 in multiple sclerosis. *Nat Rev Neurol* **8**, 624-634 (2012).
- 1067 64. Y. Lee, B. M. Morrison, Y. Li, S. Lengacher, M. H. Farah, P. N. Hoffman, Y. Liu, A.  
1068 Tsingalia, L. Jin, P. W. Zhang, L. Pellerin, P. J. Magistretti, J. D. Rothstein,  
1069 Oligodendroglia metabolically support axons and contribute to neurodegeneration. *Nature*  
1070 **487**, 443-448 (2012).
- 1071 65. A. S. Saab, I. D. Tzvetanova, K. A. Nave, The role of myelin and oligodendrocytes in  
1072 axonal energy metabolism. *Curr Opin Neurobiol* **23**, 1065-1072 (2013).



- 1073 66. J. L. Salzer, B. Zalc, Myelination. *Curr Biol* **26**, R971-R975 (2016).
- 1074 67. T. Yamauchi, G. Kang, N. Hiroi, Heterozygosity of murine Crkl does not recapitulate  
1075 behavioral dimensions of human 22q11.2 hemizyosity *Genes Brain and Behavior*  
1076 **Online Version**, e12719 (2020).
- 1077 68. G. Koscielny, G. Yaikhom, V. Iyer, T. F. Meehan, H. Morgan, J. Atienza-Herrero, A.  
1078 Blake, C. K. Chen, R. Easty, A. Di Fenza, T. Fiegel, M. Griffiths, A. Horne, N. A. Karp, N.  
1079 Kurbatova, J. C. Mason, P. Matthews, D. J. Oakley, A. Qazi, J. Regnart, A. Retha, L. A.  
1080 Santos, D. J. Sneddon, J. Warren, H. Westerberg, R. J. Wilson, D. G. Melvin, D. Smedley,  
1081 S. D. Brown, P. Flicek, W. C. Skarnes, A. M. Mallon, H. Parkinson, The International  
1082 Mouse Phenotyping Consortium Web Portal, a unified point of access for knockout mice  
1083 and related phenotyping data. *Nucleic Acids Res* **42**, D802-809 (2014).
- 1084 69. M. Nakamura, K. Ye, M. Barbachan E Silva, T. Yamauchi, D. Hoepfner, A. Fayyazuddin,  
1085 G. Kang, E. Yuda, M. Nagashima, S. Enomoto, T. Hiramoto, R. Sharp, I. Kaneko, K.  
1086 Tajinda, M. Adachi, T. Mihara, S. Tokuno, M. Geyer, P. O’Broin, M. Matsumoto, N.  
1087 Hiroi, Computational identification of variables in neonatal vocalizations predictive for  
1088 post-pubertal social behaviors in a mouse model of 16p11.2 deletion. *Molecular*  
1089 *Psychiatry Online Published on April 15, 2021*, (2021).
- 1090 70. D. Koshiyama, M. Fukunaga, N. Okada, K. Morita, K. Nemoto, K. Usui, H. Yamamori,  
1091 Y. Yasuda, M. Fujimoto, N. Kudo, H. Azechi, Y. Watanabe, N. Hashimoto, H. Narita, I.  
1092 Kusumi, K. Ohi, T. Shimada, Y. Kataoka, M. Yamamoto, N. Ozaki, G. Okada, Y.  
1093 Okamoto, K. Harada, K. Matsuo, H. Yamasue, O. Abe, R. Hashimoto, T. Takahashi, T.  
1094 Hori, M. Nakataki, T. Onitsuka, L. Holleran, N. Jahanshad, T. G. M. van Erp, J. Turner,  
1095 G. Donohoe, P. M. Thompson, K. Kasai, R. Hashimoto, Cocoro, White matter  
1096 microstructural alterations across four major psychiatric disorders: mega-analysis study in  
1097 2937 individuals. *Mol Psychiatry* **25**, 883-895 (2020).
- 1098 71. S. Kelly, N. Jahanshad, A. Zalesky, P. Kochunov, I. Agartz, C. Alloza, O. A. Andreassen,  
1099 C. Arango, N. Banaj, S. Bouix, C. A. Bousman, R. M. Brouwer, J. Bruggemann, J.  
1100 Bustillo, W. Cahn, V. Calhoun, D. Cannon, V. Carr, S. Catts, J. Chen, J. X. Chen, X.  
1101 Chen, C. Chiapponi, K. K. Cho, V. Ciullo, A. S. Corvin, B. Crespo-Facorro, V. Croypley,  
1102 P. De Rossi, C. M. Diaz-Caneja, E. W. Dickie, S. Ehrlich, F. M. Fan, J. Faskowitz, H.  
1103 Fatouros-Bergman, L. Flyckt, J. M. Ford, J. P. Fouche, M. Fukunaga, M. Gill, D. C.  
1104 Glahn, R. Gollub, E. D. Goudzwaard, H. Guo, R. E. Gur, R. C. Gur, T. P. Gurholt, R.  
1105 Hashimoto, S. N. Hatton, F. A. Henskens, D. P. Hibar, I. B. Hickie, L. E. Hong, J.  
1106 Horacek, F. M. Howells, H. E. Hulshoff Pol, C. L. Hyde, D. Isaev, A. Jablensky, P. R.  
1107 Jansen, J. Janssen, E. G. Jonsson, L. A. Jung, R. S. Kahn, Z. Kikinis, K. Liu, P. Klauser,  
1108 C. Knochel, M. Kubicki, J. Lagopoulos, C. Langen, S. Lawrie, R. K. Lenroot, K. O. Lim,  
1109 C. Lopez-Jaramillo, A. Lyall, V. Magnotta, R. C. W. Mandl, D. H. Mathalon, R. W.  
1110 McCarley, S. McCarthy-Jones, C. McDonald, S. McEwen, A. McIntosh, T. Melicher, R. I.  
1111 Meshulam-Gately, P. T. Michie, B. Mowry, B. A. Mueller, D. T. Newell, P. O’Donnell, V.  
1112 Oertel-Knochel, L. Oestreich, S. A. Paciga, C. Pantelis, O. Pasternak, G. Pearlson, G. R.  
1113 Pellicano, A. Pereira, J. Pineda Zapata, F. Piras, S. G. Potkin, A. Preda, P. E. Rasser, D. R.  
1114 Roalf, R. Roiz, A. Roos, D. Rotenberg, T. D. Satterthwaite, P. Savadjiev, U. Schall, R. J.  
1115 Scott, M. L. Seal, L. J. Seidman, C. Shannon Weickert, C. D. Whelan, M. E. Shenton, J. S.  
1116 Kwon, G. Spalletta, F. Spaniel, E. Sprooten, M. Stablein, D. J. Stein, S. Sundram, Y. Tan,  
1117 S. Tan, S. Tang, H. S. Temmingh, L. T. Westlye, S. Tonnesen, D. Tordesillas-Gutierrez,  
1118 N. T. Doan, J. Vaidya, N. E. M. van Haren, C. D. Vargas, D. Vecchio, D. Velakoulis, A.  
1119 Voineskos, J. Q. Voyvodic, Z. Wang, P. Wan, D. Wei, T. W. Weickert, H. Whalley, T.  
1120 White, T. J. Whitford, J. D. Wojcik, H. Xiang, Z. Xie, H. Yamamori, F. Yang, N. Yao, G.  
1121 Zhang, J. Zhao, T. G. M. van Erp, J. Turner, P. M. Thompson, G. Donohoe, Widespread

- 1122 white matter microstructural differences in schizophrenia across 4322 individuals: results  
1123 from the ENIGMA Schizophrenia DTI Working Group. *Mol Psychiatry*, (2017).
- 1124 72. B. G. Travers, E. D. Bigler, P. M. Tromp do, N. Adluru, A. L. Froehlich, C. Ennis, N.  
1125 Lange, J. A. Nielsen, M. B. Prigge, A. L. Alexander, J. E. Lainhart, Longitudinal  
1126 processing speed impairments in males with autism and the effects of white matter  
1127 microstructure. *Neuropsychologia* **53**, 137-145 (2014).
- 1128 73. P. Desaunay, A. R. Briant, D. M. Bowler, M. Ring, P. Gerardin, J. M. Baleyte, F.  
1129 Guenole, F. Eustache, J. J. Parienti, B. Guillery-Girard, Memory in autism spectrum  
1130 disorder: A meta-analysis of experimental studies. *Psychol Bull* **146**, 377-410 (2020).
- 1131 74. B. Zikopoulos, H. Barbas, Changes in prefrontal axons may disrupt the network in autism.  
1132 *J Neurosci* **30**, 14595-14609 (2010).
- 1133 75. R. C. Gur, D. L. Braff, M. E. Calkins, D. J. Dobie, R. Freedman, M. F. Green, T. A.  
1134 Greenwood, L. C. Lazzeroni, G. A. Light, K. H. Nuechterlein, A. Olincy, A. D. Radant, L.  
1135 J. Seidman, L. J. Siever, J. M. Silverman, J. Sprock, W. S. Stone, C. A. Sugar, N. R.  
1136 Swerdlow, D. W. Tsuang, M. T. Tsuang, B. I. Turetsky, R. E. Gur, Neurocognitive  
1137 performance in family-based and case-control studies of schizophrenia. *Schizophr Res*  
1138 **163**, 17-23 (2015).
- 1139 76. R. S. Keefe, The longitudinal course of cognitive impairment in schizophrenia: an  
1140 examination of data from premorbid through posttreatment phases of illness. *J Clin*  
1141 *Psychiatry* **75 Suppl 2**, 8-13 (2014).
- 1142 77. B. N. Phan, J. F. Bohlen, B. A. Davis, Z. Ye, H. Y. Chen, B. Mayfield, S. R. Sripathy, S.  
1143 Cerceo Page, M. N. Campbell, H. L. Smith, D. Gallop, H. Kim, C. L. Thaxton, J. M.  
1144 Simon, E. E. Burke, J. H. Shin, A. J. Kennedy, J. D. Sweatt, B. D. Philpot, A. E. Jaffe, B.  
1145 J. Maher, A myelin-related transcriptomic profile is shared by Pitt-Hopkins syndrome  
1146 models and human autism spectrum disorder. *Nat Neurosci* **23**, 375-385 (2020).
- 1147 78. A. I. Silva, J. E. Haddon, Y. Ahmed Syed, S. Trent, T. E. Lin, Y. Patel, J. Carter, N. Haan,  
1148 R. C. Honey, T. Humby, Y. Assaf, M. J. Owen, D. E. J. Linden, J. Hall, L. S. Wilkinson,  
1149 Cyfip1 haploinsufficient rats show white matter changes, myelin thinning, abnormal  
1150 oligodendrocytes and behavioural inflexibility. *Nat Commun* **10**, 3455 (2019).
- 1151 79. C. Marie, A. Clavairoly, M. Frah, H. Hmidan, J. Yan, C. Zhao, J. Van Steenwinckel, R.  
1152 Daveau, B. Zalc, B. Hassan, J. L. Thomas, P. Gressens, P. Ravassard, I. Moszer, D. M.  
1153 Martin, Q. R. Lu, C. Parras, Oligodendrocyte precursor survival and differentiation  
1154 requires chromatin remodeling by Chd7 and Chd8. *Proc Natl Acad Sci U S A* **115**, E8246-  
1155 E8255 (2018).
- 1156 80. A. Kawamura, Y. Katayama, M. Nishiyama, H. Shoji, K. Tokuoka, Y. Ueta, M. Miyata,  
1157 T. Isa, T. Miyakawa, A. Hayashi-Takagi, K. I. Nakayama, Oligodendrocyte dysfunction  
1158 due to Chd8 mutation gives rise to behavioral deficits in mice. *Hum Mol Genet* **29**, 1274-  
1159 1291 (2020).
- 1160 81. E. Berret, T. Barron, J. Xu, E. Debner, E. J. Kim, J. H. Kim, Oligodendroglial excitability  
1161 mediated by glutamatergic inputs and Nav1.2 activation. *Nat Commun* **8**, 557 (2017).
- 1162 82. M. Schneider, M. Debbane, A. S. Bassett, E. W. Chow, W. L. Fung, M. B. van den Bree,  
1163 M. Owen, K. C. Murphy, M. Niarchou, W. R. Kates, K. M. Antshel, W. Fremont, D. M.  
1164 Donald-McGinn, R. E. Gur, E. H. Zackai, J. Vorstman, S. N. Duijff, P. W. Klaassen, A.  
1165 Swillen, D. Gothelf, T. Green, A. Weizman, A. T. van, L. Evers, E. Boot, V. Shashi, S. R.  
1166 Hooper, C. E. Bearden, M. Jalbrzikowski, M. Armando, S. Vicari, D. G. Murphy, O.  
1167 Ousley, L. E. Campbell, T. J. Simon, S. Eliez, Psychiatric Disorders From Childhood to  
1168 Adulthood in 22q11.2 Deletion Syndrome: Results From the International Consortium on  
1169 Brain and Behavior in 22q11.2 Deletion Syndrome. *Am. J. Psychiatry* **171**, 627-639  
1170 (2014).

- 1171 83. N. Hiroi, Critical Reappraisal of Mechanistic Links of Copy Number Variants to  
1172 Dimensional Constructs of Neuropsychiatric Disorders in Mouse Models. *Psychiatry and*  
1173 *Clinical Neurosciences* **72**, 301-321 (2018).
- 1174 84. J. Dazai, S. Spring, L. S. Cahill, R. M. Henkelman, Multiple-mouse neuroanatomical  
1175 magnetic resonance imaging. *J Vis Exp*, e2497 (2011).
- 1176 85. L. C. Schmued, A rapid, sensitive histochemical stain for myelin in frozen brain sections.  
1177 *J Histochem Cytochem* **38**, 717-720 (1990).
- 1178 86. J. H. Venable, R. Coggeshall, A Simplified Lead Citrate Stain for Use in Electron  
1179 Microscopy. *J Cell Biol* **25**, 407-408 (1965).
- 1180 87. E. S. Reynolds, The use of lead citrate at high pH as an electron-opaque stain in electron  
1181 microscopy. *J Cell Biol* **17**, 208-212 (1963).
- 1182

1183

1184

1185 **Acknowledgments**

1186 **General:** We thank Dr. Bernice Morrow for providing the original breeders of *Tbx1<sup>+/-</sup>*  
1187 mice.

1188 **Funding:** This study was partly supported by the National Institutes of Health  
1189 (R01MH099660, R01DC015776, R21HD053114). The content is solely the responsibility  
1190 of the authors and does not necessarily represent the official views of the National  
1191 Institutes of Health.

1192 **Author Contributions:** T. Hiramoto and N. Hiroi designed the study and analyzed all the  
1193 data. A. Sumiyoshi, R. Ryoke, H. Nonaka, and R. Kawashima designed and performed  
1194 the DTI-MRI study and analyzed the data. T. Yamauchi performed gold staining  
1195 immunohistochemistry and qRT-PCR and analyzed the data. G. Kang maintained and  
1196 genotyped the mouse colony of *Tbx1<sup>+/-</sup>* mice and performed behavioral studies, except  
1197 for the Morris water maze and attentional set shifting tasks. T. Hiramoto performed the  
1198 Morris water maze test and analyzed the data. T. Hiramoto., S. Enomoto, and T. Izumi  
1199 performed attentional set shifting and analyzed the data. K. Tanigaki performed *in vitro*  
1200 cell cultures of oligodendrocytes and analyzed the data. T. Hiramoto, A. Sumiyoshi, R.  
1201 Kato, T. Yamauchi, G. Kang, K. Tanigaki, and N. Hiroi wrote the manuscript.

1202 **Competing interests:** None

1203 **Data and material availability:** All data are available upon request. Mice are available  
1204 through the Material Transfer Agreement.

1205

1206

1207 **Figures**

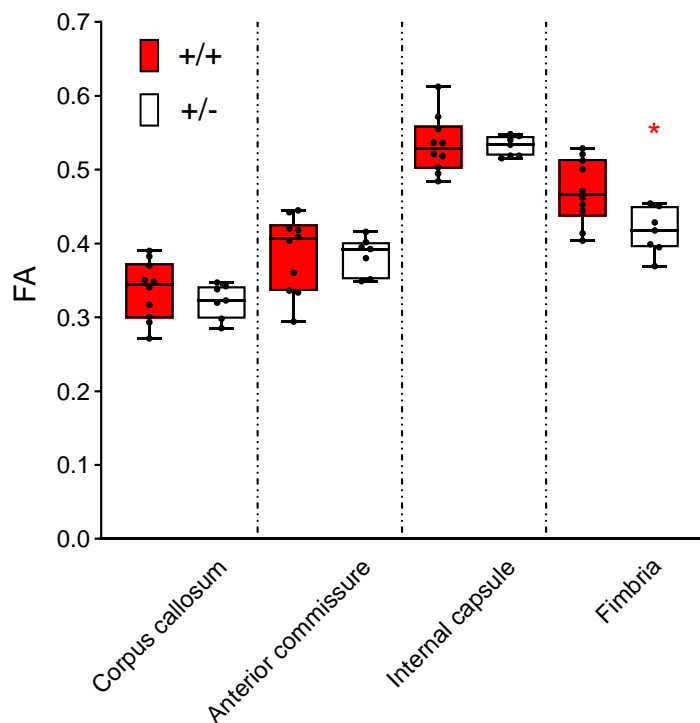

1208

1209

1210

1211

1212

1213

**Figure 1.** Box-and-Whisker plots of fractional anisotropy (FA) values of the four regions with FA >0.3. Analysis using a generalized linear mixed model revealed a region-dependent differential effect of genotype on FA values (Genotype x Region,  $F(3,45) = 7.337$ ,  $P < 0.001$ ). Mann–Whitney U-tests revealed a significant between-genotype difference in the fimbria only (\*,  $U = 11$ ,  $p = 0.0185$ ). +/+,  $n = 10$ ; +/-,  $n = 7$ .

1214

1215

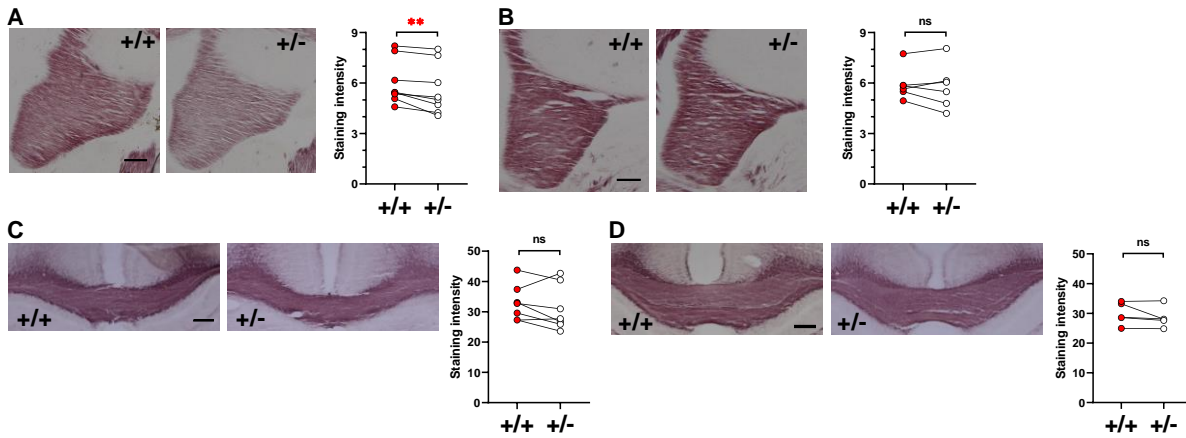

1216  
1217  
1218 **Figure 2.** Black-Gold II staining of myelin in the anterior fimbria (A), posterior fimbria (B),  
1219 anterior corpus callosum (C), and posterior corpus callosum (D) (see **Supplemental Fig.**  
1220 **S6**). Representative images of gold-stained myelin (left panels) and staining intensities of  
1221 each pair of +/+ and +/- mice (right panels) are shown. Given that the assumptions of  
1222 normality and homogeneity of variance of the raw data from all sections were not met,  
1223 we used non-parametric Wilcoxon tests for paired +/+ and +/- sections of comparable  
1224 anterior-posterior positions within each slide. Compared with +/+ littermates, +/- mice  
1225 exhibited significantly decreased levels of gold staining in the anterior fimbria (\*\*, p =  
1226 0.0078), but not in the posterior fimbria (not significant (ns), p = 0.5625), anterior corpus  
1227 callosum (ns, p = 0.2969), or posterior corpus callosum (ns, p = 0.1875). Anterior fimbria,  
1228 8 +/+ mice and 8 +/- mice; posterior fimbria, 6 +/+ mice and 6 +/- mice; anterior corpus  
1229 callosum, 7 +/+ mice and 7 +/- mice; posterior corpus callosum, 5 +/+ mice and 5 +/-  
1230 mice. Scale bar = 200  $\mu$ m.  
1231



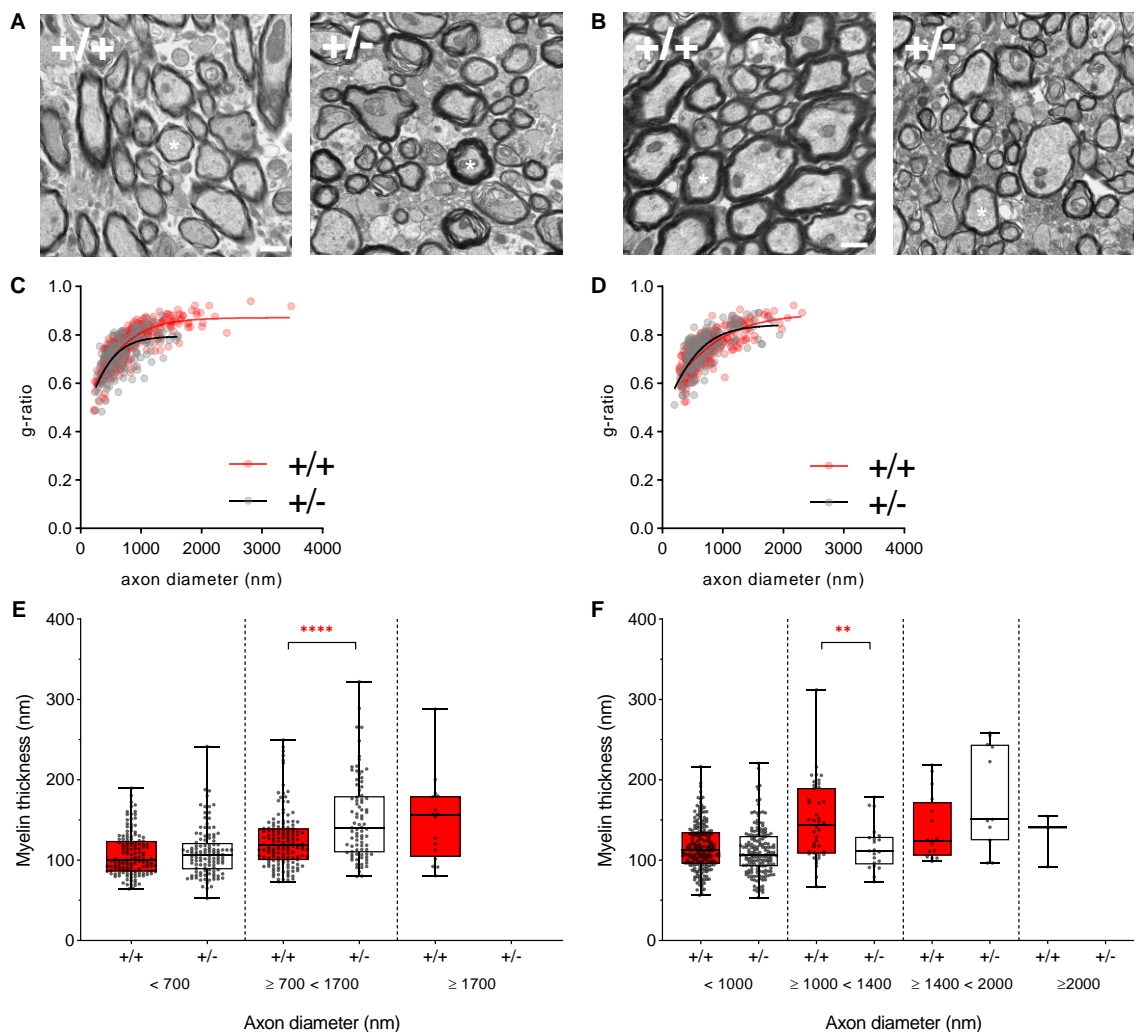

1232

1233

1234

1235

1236

1237

1238

1239

1240

1241

1242

1243

1244

1245

1246

1247

1248

1249

1250

1251

1252

1253

**Figure 3** Electron microscopy (EM) images of myelin in the fimbria (**A**) and corpus callosum (**B**). We analyzed 300 and 200 axons in the fimbria of both hemispheres in three +/+ and two +/- mice, respectively. We analyzed 260 and 200 axons in the corpus callosum of both hemispheres in +/+ and +/- mice, respectively. Ten images were obtained from the fimbria or corpus callosum of each mouse, except for one +/+ mouse that had six available images of the corpus callosum. Ten randomly chosen myelinated axons were analyzed from each image. Data from each image and axon were treated as random duplicates. Scale bar = 800nm. (**C**) G-ratios in the fimbria across captured images and axons within each image were consistently lower in +/- mice than in +/+ mice. Since the normality assumptions were not met (+/+,  $p = 0.003$ ; +/-,  $p = 0.005$ ), we used a generalized linear mixed model (Genotype,  $F(1,300) = 19.539$ ,  $p < 0.001$ ; Genotype x Image,  $F(9,300) = 1.011$ ,  $p = 0.431$ ; Genotype x Axon,  $F(9,300) = 0.519$ ,  $p = 0.861$ ; Genotype x Image x Axon,  $F(81,300) = 1.211$ ,  $p = 0.129$ ). (**D**) G-ratios in the corpus callosum did not differ between the genotypes (Genotype,  $F(1,260) = 0.025$ ,  $p = 0.876$ ; Genotype x Axon,  $F(9,260) = 0.760$ ,  $p = 0.654$ ; Genotype x Image x Axon,  $F(81,260) = 1.009$ ,  $p = 0.467$ ). The g-ratio was calculated as  $g = d/D$ , where  $d$  and  $D$  represent the axon and axon + myelin diameters, respectively. (**E,F**) Box-and-Whisker plots of myelin thickness ( $Y$ , nm) for a range of axon diameters ( $X$ , nm) in the fimbria (**E**) and corpus callosum (**F**). The ranges are based on segments where +/+ and +/- differed (see **Fig. S7AB**). In +/- mice, myelin thickness in the fimbria was increased for axon diameters  $\geq 700$  nm and  $< 1,700$  nm (Mann–Whitney  $U = 4,202$ ,  $p < 0.0001$ , \*\*\*\*) (see

1254 white stars in **A**), but not for those with diameters  $<700$  nm (Mann–Whitney  $U = 7,653$ ,  $p$   
1255  $= 0.5473$ ). There were no fimbria axons with diameters  $\geq 1700$  nm in +/- mice (see **Fig.**  
1256 **S8; Table S1**). In +/- mice, myelin thickness in the corpus callosum was decreased for  
1257 axons with diameters  $\geq 1,000$  nm and  $<1,400$  nm (Mann–Whitney  $U = 258$ ,  $p = 0.0071$ ,  
1258 **\*\***) but not for those with other diameter ranges ( $<1,000$  nm; Mann–Whitney  $U = 14,989$ ,  $p$   
1259  $= 0.0881$ ;  $\geq 1,400$  nm; Mann-Whitney  $U = 56$ ,  $p = 0.1214$ ). There were no corpus callosum  
1260 axons with diameters  $>1,400$  nm axons in +/- mice.



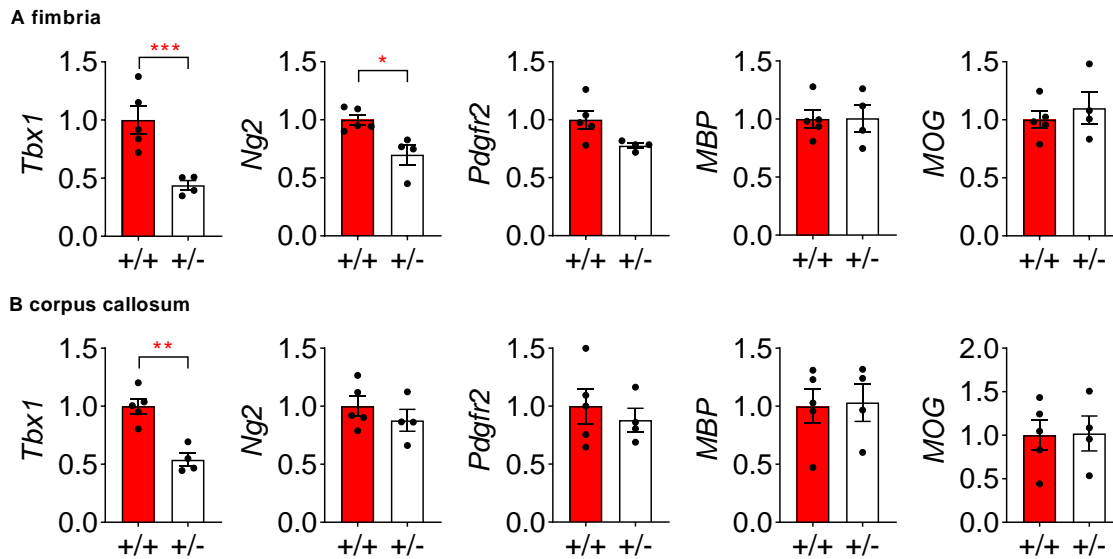

**Figure 4.** Relative mRNA expression levels (mean±standard error of the mean [SEM]) for *Tbx1*, *Ng2*, *Pdgfr2*, myelin basic protein (MBP), and myelin oligodendrocyte glycoprotein (MOG) in the fimbria (A) and corpus callosum (B) of *Tbx1*<sup>+/+</sup> (n = 5) and *Tbx1*<sup>+/-</sup> (n = 4) mice. *Tbx1* mRNA levels were lower in the fimbria (A,  $t(7)=4.081$ ,  $p = 0.0047$ , \*\*\*) and corpus callosum (B,  $t(7)=5.221$ ,  $p = 0.0012$ , \*\*) of *Tbx1*<sup>+/-</sup> mice than in those of *Tbx1*<sup>+/+</sup> mice. In the fimbria, levels of *Ng2* (A,  $t(7)=3.394$ ,  $p = 0.0115$ , \*) were lower in *Tbx1*<sup>+/-</sup> mice than in *Tbx1*<sup>+/+</sup> mice. These significant differences survived Benjamini–Hochberg’s correction at the false discovery rate (FDR) of 5%. There were no other significant differences in the fimbria or corpus callosum (A,B,  $p>0.05$ ).

1261  
1262  
1263  
1264  
1265  
1266  
1267  
1268  
1269  
1270  
1271  
1272  
1273  
1274  
1275  
1276  
1277

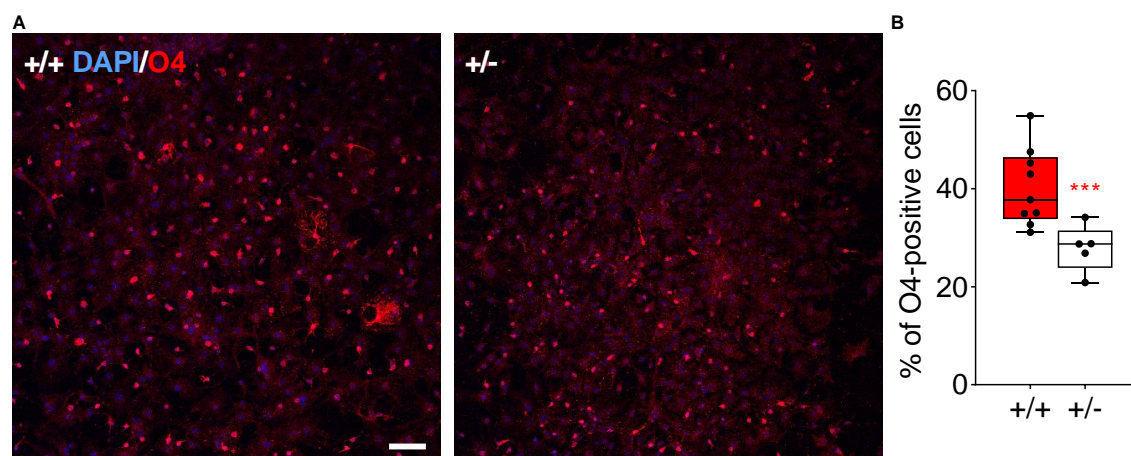

1278  
1279  
1280  
1281  
1282  
1283  
1284  
1285  
1286  
1287  
1288

**Figure 5.** Representative images (A) and Box-and-Whisker plots (B) of O4-positive (red) oligodendrocytes among all DAPI-positive (blue) cells in culture. Since the assumption of normality was not met (Shapiro–Wilk tests: +/+,  $W(35) = 0.888$ ,  $p = 0.002$ ; +/-,  $W(19) = 0.898$ ,  $p = 0.045$ ), we applied a generalized linear mixed model of log transformed data. Progenitor cells derived from the lateral ventricular walls of P21 *Tbx1* +/- mice produced consistently fewer O4-positive oligodendrocytes than those of +/+ mice across the cultures (Genotype,  $F(1,11.451) = 12.841$ ,  $p = 0.004$ , \*\*\*; Image field,  $F(3, 33.978) = 0.609$ ,  $p = 0.614$ ; Genotype x Image field,  $F(3,33.978) = 0.134$ ,  $p = 0.939$ ). Scale bar = 200  $\mu\text{m}$ . +/+,  $n = 9$ ; +/-,  $n = 5$ .

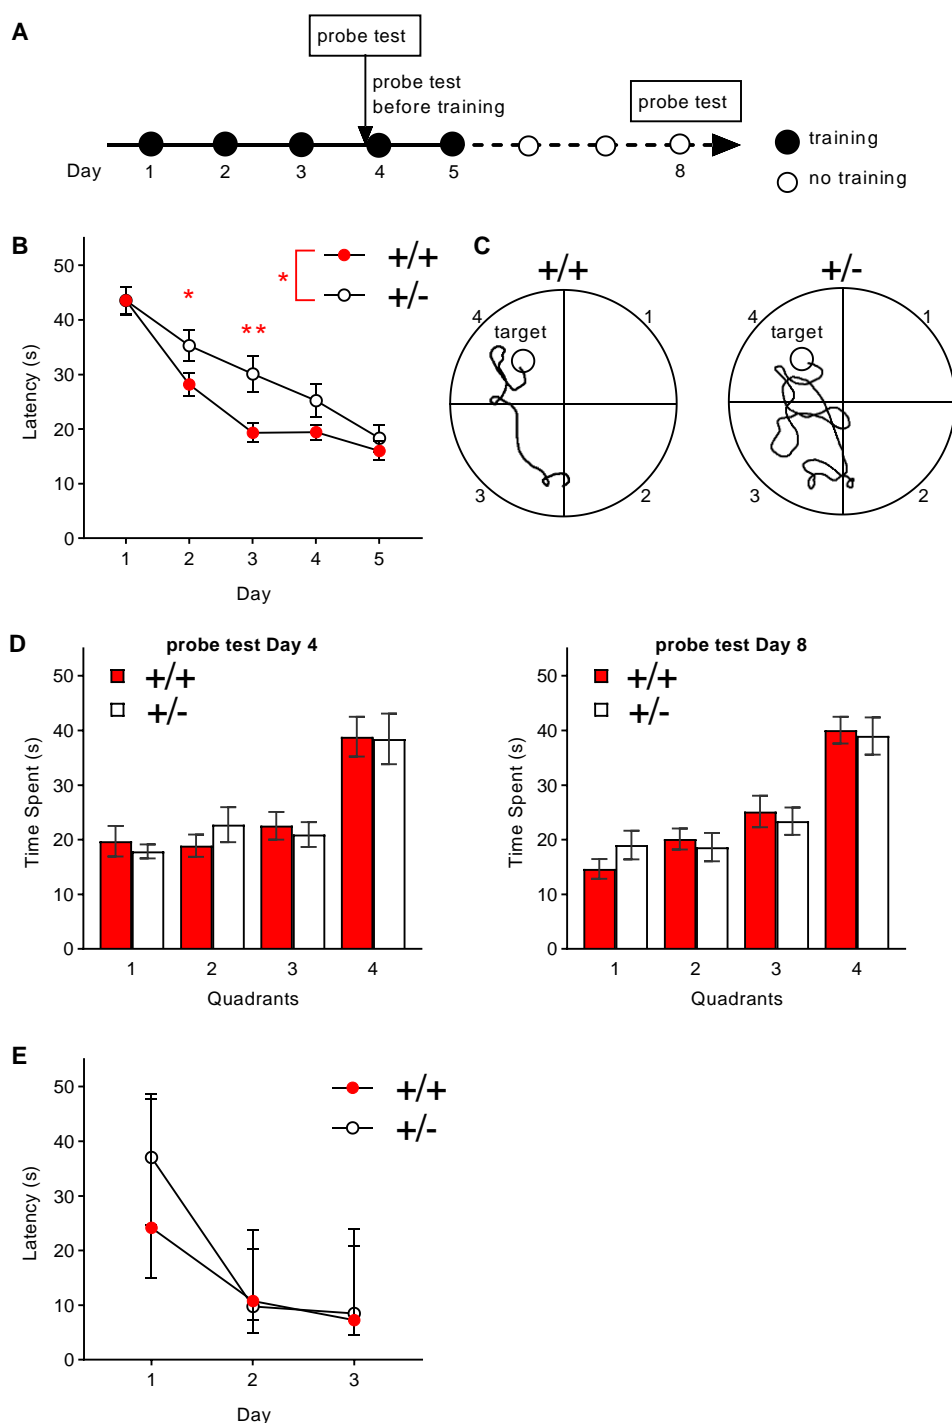

1289  
1290  
1291  
1292  
1293  
1294  
1295  
1296  
1297  
1298  
1299

**Fig. 6.** Performance in the Morris water maze test. **(A)** Experimental design. **(B)** The mean ( $\pm$  standard error of the mean [SEM]) escape latency in seconds (s) to the platform during acquisition is plotted against days. Compared with +/+ mice, +/- mice exhibited delayed acquisition (Genotype,  $F(1,26) = 4.643$ ,  $p = 0.041$ , \*; Day,  $F(4,104) = 55.490$ ,  $p < 0.001$ ; Genotype  $\times$  Day,  $F(4,104) = 2.329$ ,  $p = 0.061$ ). The overall genotype effect was primarily due to robust differences on Day 2 (\*,  $p < 0.05$ ) and Day 3 (\*\*,  $p < 0.01$ ), as determined by Newman-Keuls post-hoc tests. +/+,  $n = 14$ ; +/-,  $n = 14$ . **(C)** Representative swim paths of a +/+ mouse and +/- mouse on the third training day. The target quadrant included the hidden platform. **(D)** The mean ( $\pm$ SEM) time spent during recall probe tests before training on Day 4 (left) and Day 8 (right). Regardless of the

1300 quadrant, there were between-genotype differences on Day 4 (Genotype,  $F(1,26) =$   
1301  $5.597$ ,  $p = 0.026$ ; Quadrant,  $F(3,78) = 14.259$ ,  $p < 0.001$ ; Genotype  $\times$  Quadrant,  
1302  $F(3,78) = 0.295$ ,  $p = 0.829$ ) and Day 8 (Genotype,  $F(1,26) = 10.207$ ,  $p = 0.004$ ;  
1303 Quadrant,  $F(3,78) = 24.031$ ,  $p < 0.001$ ; Genotype  $\times$  Quadrant,  $F(3,78) = 0.562$ ,  $p =$   
1304  $0.642$ ). The significant main effects of genotype on both days primarily resulted from the  
1305 generally lower amounts of time spent in three out of the four quadrants in +/- mice (Day  
1306 4, Quadrants 1, 3, and 4; Day 8, Quadrants 2, 3, and 4). (E) The mean ( $\pm$ SEM) escape  
1307 latency in the visible cue task. A separate set of mice underwent examination using this  
1308 version of the Morris water maze. +/+ and +/- mice equally acquired this task (Genotype,  
1309  $F(1,17) = 1.861$ ,  $p = 0.190$ ; Day,  $F(2,34) = 52.313$ ,  $p < 0.001$ ; Genotype  $\times$  Day,  $F(2,34)$   
1310  $= 1.229$ ,  $p = 0.305$ ) (+/+,  $n = 8$ ; +/-,  $n = 11$ ).  
1311

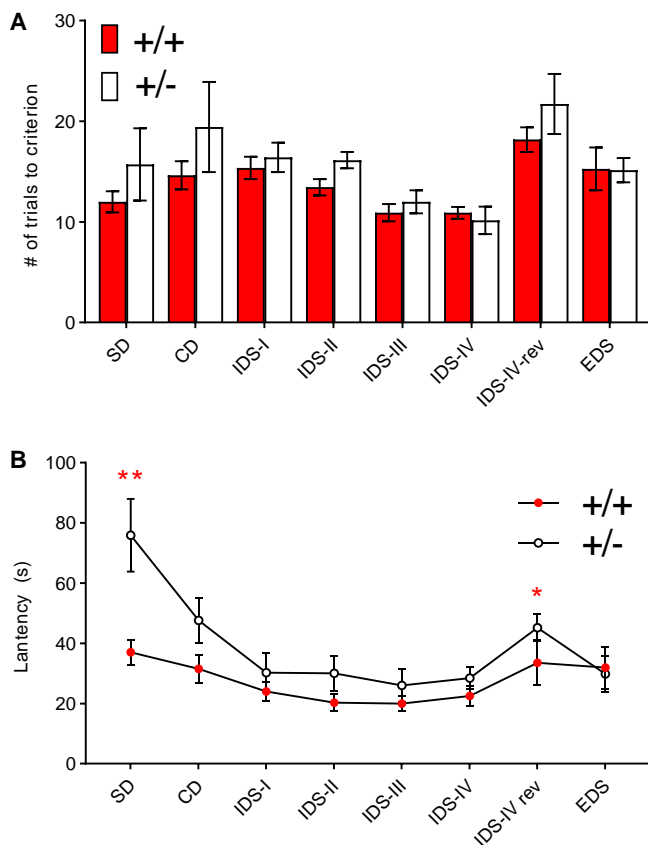

1312  
1313  
1314  
1315  
1316  
1317  
1318  
1319  
1320  
1321  
1322  
1323  
1324  
1325  
1326  
1327

**Figure 7.** Attentional set shifting. **A)** The mean number ( $\pm$  standard error of the mean [SEM]) of trials required to reach the criterion (i.e., eight consecutive correct choices). Since the normality assumption was violated ( $p = 0.002$ , at IDS-IV of +/-), we performed analysis using a generalized linear mixed model. There was no between-genotype difference in the number of trials taken to reach the criterion (Genotype,  $F(1,16) = 1.965$ ,  $p = 0.180$ ; Genotype x Phase,  $F(7,112) = 0.824$ ,  $p = 0.569$ ). SD, simple discrimination; CD, compound discrimination; IDS, intra-dimensional shift; rev, reversal; EDS, extradimensional shift. **(B)** The mean latency ( $\pm$ SEM) to complete each trial during the first five correct choices. Since the normality assumption was violated ( $p = 0.001$ , at IDS-IV rev of +/+), a generalized linear mixed model was used for analysis. +/- mice were consistently slow in completing this task in a phase-dependent manner (Genotype,  $F(1,16) = 10.010$ ,  $p = 0.006$ ; Genotype x Phase,  $F(7, 112) = 2.566$ ,  $p = 0.017$ ). Mann-Whitney non-parametric post hoc comparisons revealed a significant between-genotype difference in latency to completing the two phases of SD (\*\*,  $p < 0.01$ ) and IDS-IV rev (\*,  $p < 0.05$ ). +/+ = 11, +/- = 7.
